# Supplementary material for: Systems biology of the IMIDIA biobank from organ donors and pancreatectomised patients defines a novel transcriptomic signature of islets from individuals with type 2 diabetes
Source: Springer Nature journal article supplement (doi:10.1007/s00125-017-4500-3), 2017-11-28
Supplement: MOESM1 [file 125_2017_4500_MOESM1_ESM.pdf › 125_2017_4500_MOESM1_ESM.pdf]

## ESM Methods

### Islet procurement, insulin secretion and RNA extraction

*Islet procurement from OD.* Pancreases not suitable for transplantation were obtained in Pisa from 161 non-diabetic and 39 type 2 diabetic heart-beating OD under approval from the local ethics committees (ESM Table 6). The donors' full clinical history and major laboratory parameters, such as blood glucose during the intensive care unit stay and fructosamine, were collected to assess the presence of diabetes. Well-preserved islets were isolated from the pancreases of 153 non-diabetic and 34 type 2 diabetic OD. After  $2\pm 1$  days of culture, islets were successfully hand-picked from 141 preparations (115 ND and 26 type 2 diabetic) and processed for further analyses. Forty-three human islet preparations, all from non-diabetic OD, were acquired by Eli Lilly from Prodo Laboratories Inc. (Irvine, CA, USA). Isolated islets were prepared by enzymatic digestion and were shipped to Lilly after recovery for 1–2 days in culture.

*Islet procurement from PPP.* Pancreatic tissues and blood samples were collected from patients undergoing partial pancreatectomy in the Department of Surgery, University Hospital of TU Dresden. Patients age <18 years were excluded. The local ethics committee approved the study and all of the patients provided written informal consent. Information collected immediately before surgery included: individual and family medical history, BMI, standard clinical parameters, HbA<sub>1c</sub> concentrations, and fasting glucose and insulin concentrations. Non-diabetic subjects with fasting glycaemia <7.0 mmol/l underwent an OGTT to measure glucose, insulin, proinsulin and C-peptide at 0, 60 at 120 min after a glucose load within a few days before surgery. Among PPP 70 were ND (fasting glycaemia <7.0 mmol/l; HbA<sub>1c</sub> <6.5%, glycaemia at 2 h after presurgical oral glucose tolerance test [OGTT] <7.8 mmol/l), 54 had T2D (fasting glycaemia  $\geq 7.0$  mmol/l; HbA<sub>1c</sub>  $\geq 6.5\%$ , history of diabetes for >1 year), 30 had impaired glucose tolerance (IGT) (fasting glycaemia <7.0 mmol/l; HbA<sub>1c</sub> <6.5%, OGTT at 2 h of  $\geq 7.8$  to <11.1 mmol/l), and 46 had diabetes, likely due to the associated pancreatic disorder leading to surgery, also termed type 3c diabetes (T3cD) (ESM Table 6). A diagnosis of T3cD was made if pathological glucose tolerance (fasting glycaemia  $\geq 7.0$  mmol/l, HbA<sub>1c</sub>  $\geq 6.5\%$  and/or pre-surgical OGTT at 2 h  $\geq 11.1$  mmol/l) was first detected <1 year before the symptoms, which led to surgery. Fasting potassium and magnesium concentrations were measured to exclude false-positive results. All patients were screened for autoantibodies against insulin, GAD65, ZnT8, and IA-2/ICA512, as previously described [1].

*Insulin secretion from OD islets.* Islet insulin release was assessed by immunoradiometric assay, as previously described [2, 3]. After isolation, the islets were cultured for 2–3 days before groups of 15 islets of comparable size were hand-picked and incubated at 37°C for 45 min in Krebs–Ringer bicarbonate solution (KRB), 0.5% albumin, pH 7.4, and 3.3 mmol/l glucose. Then, the medium was completely removed, assayed for basal insulin secretion, and replaced with KRB containing either 16.7 mmol/l glucose, 3.3 mmol/l glucose plus 100  $\mu$ mol/l glyburide, or 3.3 mmol/l glucose plus 20 mmol/l arginine. After incubation for 45 min, the medium was removed and insulin levels were measured to assess stimulated insulin release. Insulin secretion was also expressed as insulin stimulation index (ISI) – the ratio of stimulated to basal insulin secretion.

*Extraction of RNA from islets isolated enzymatically or by LCM.* Two–three days after enzymatic isolation, groups of 100–120 islets from 125 OD at Univ. Pisa were hand-picked, rinsed in sterile PBS (Sigma-Aldrich) and centrifuged at  $3,000 \times g$  for 5 min. The supernatant was disposed and 100  $\mu$ l of extraction buffer (PicoPure RNA Isolation Kit; Life Technologies, Foster City, CA) was added. Samples were incubated at 42°C for 30 min, centrifuged at  $3,000 \times g$  for 2 min, and the supernatant was collected and stored at  $-80^{\circ}\text{C}$  until RNA isolation. RNA isolation was performed according to the manufacturer's protocol. Briefly, 100  $\mu$ l of 70% ethanol were added to the cell extract, the mixture was added to the purification columns, washed, and subjected to DNase treatment by incubation with 40  $\mu$ l of DNase I solution (RNase-Free DNase Set; Qiagen GmbH, Hilden, Germany) for 15 min. Two additional washes were performed and RNA was eluted in 30  $\mu$ l of elution buffer. The RNA concentration and purity were evaluated using a NanoDrop 2000c spectrophotometer (Thermo Scientific, Wilmington, DE) and RNA quality was evaluated using the Agilent 2100 Bioanalyzer system and the Agilent RNA 6000 Pico Kit (Agilent Technologies, Santa Clara, CA). The same procedure was applied at Lilly, Indianapolis for RNA extraction from islets of 39 OD. The mean yield of total RNA from 100–200 islets from non-diabetic and type 2 diabetic subjects at University of Pisa was  $913 \pm 340$  ng (RNA Integrity Number [RIN]:  $8.1 \pm 0.5$ ) and  $1016 \pm 329$  ng (RIN:  $8.3 \pm 0.4$ ), respectively. In the case of islets processed at Eli Lilly in Indianapolis, the mean yield of total RNA from 5,000 islet equivalents was  $7.13 \pm 6.61$   $\mu$ g with a RIN of  $8.0 \pm 0.5$ .

Pancreatic islets within resected pancreas specimens were isolated in Dresden by LCM with a Zeiss Palm MicroBeam system in the light microscopy facilities of the BIOTEC/CRTD at TU Dresden and MPI-CBG. In the case of three PPP islets were also isolated in parallel from small surgical specimens as previously described [4], except for the use of MTF as protease blend (Roche, Penzberg, Germany). Conversely pancreatic tissue sections from three OD whose islets were isolated enzymatically in Pisa were used as a source for islet retrieval by LCM in Dresden, following the same protocol applied for LCM of islets for surgical specimen of PPP. RNA extraction from LCM islets was also performed using the PicoPure RNA Isolation Kit as previously described [5]. Information about average islet yield, RNA quantity and RIN is provided in ESM Table 16.

*Preparation of human islet beta and alpha cell-enriched fractions.* The methods used to prepare the human islet beta and alpha cell-enriched fractions were previously described [6] and validated [7,8]. Briefly, human islets were dissociated into single-cell suspensions by incubation with constant agitation for 3 min at 37°C in 0.05% trypsin-EDTA (Thermo Fisher Scientific Inc.) supplemented with 3 mg/ml DNase I (Roche, Basel, Switzerland), followed by pipetting vigorously to complete the dissociation. Labelling and sorting of the alpha and beta cell fractions was performed by Newport Green labelling [9] followed by FACS, as previously described [8].

### **Microarrays**

*RNAseq of OD islets exposed ex vivo to hyperglycaemia.*

Three independent islet preparations from ND OD (age:  $80 \pm 4$  years, sex: 1F/2M, BMI:  $22.7 \pm 0.6$  kg/m<sup>2</sup>) were used to assess islet gene expression after exposure to 22.2 mmol/l glucose. Briefly, after isolation the islets were cultured for 2 days in M199 culture medium with 5.5 mmol/l glucose; then batches of islets were cultured for additional 2 days in medium with either 5.5 mmol/l glucose (control islets) or 22.2 mmol/l glucose. At the end of the culture period,

approximately 120 islets hand-picked and their RNA extracted using the RNeasy Mini Kit plus QIAshredder (Qiagen, Hilden, Germany) through lysing and homogenizing steps followed by DNA digestion using RNase-Free DNase Set (Qiagen) and washing steps. Total RNA concentration was measured using the NanoDrop™ 2000c Spectrophotometer (Thermo Fisher Scientific, Waltham, MA USA) and RNA quality was assessed by Agilent Bioanalyzer 2100 Instrument (Agilent Technologies, Wokingham, UK) and Agilent RNA Nano Chips (Agilent Technologies). The mean yield of total RNA was  $1,298 \pm 374$  ng and the mean RIN was  $8.4 \pm 0.7$ .

*RNA quality assessment, processing, and transcriptomic profiling.* Total RNA of islets from OD and PPP was quantified with the NanoDrop 2000 Spectrophotometer (Thermo Scientific). RNA quality was assessed using the Agilent 2100 Bioanalyzer and the Agilent RNA 6000 Pico kit (Agilent Technologies) and further processed for Affymetrix if the RIN was  $>4.1$ . For cDNA preparation, 10–25 ng of total RNA was amplified using the Ovation RNA Amplification System V2 and was subsequently labelled with Biotin using the Encore™ Biotin Module according to the manufacturer's instructions (NuGEN Technologies, San Carlos, CA). The length distribution of the amplified cDNA products was determined using an Agilent 2100 Bioanalyzer (Agilent Technologies). Hybridisation of biotin-labelled cDNA to Affymetrix HG\_U133Plus2.0 GeneChip microarrays was performed at ATLAS Biolabs GmbH (Berlin, Germany). Briefly, 3.75 µg of cDNA per sample were hybridised to the genechips for 16–18 h at 45°C in a rotating hybridisation oven at 60 rpm (Hybridization Oven 640; Affymetrix). The array was subsequently washed and stained with a fluidics station (GeneChip® Fluidics Station 450; Affymetrix) according to the EukGe\_WSV4\_450 fluidics protocol for eukaryotic 3'-expression arrays. Arrays were scanned using GeneChip Scanner 3000 7G (Affymetrix) and primary data analysis was performed with Affymetrix software GeneChip Operating System (GCOS) v1.4.

*Cell culture and transfection.* CHO cells grown on SuperFrost Plus slides were transiently transfected with cDNA vectors using Lipofectamine according to the manufacturer's instructions (Thermo Fisher Scientific Inc.). Cells were fixed for 24 h after transfection with formalin for 30 min and then used for validation of anti-ARG2 (sc-20151, Santa Cruz Biotechnology, Dallas, TX), anti-PPP1R1A (ab40877, Abcam, Cambridge, UK) or anti-TMEM37 antibodies (ab111287, Abcam) for immunocytochemistry using the Ventana XT staining system (Roche). Cell transfection was verified in parallel by immunocytochemical detection of overexpressed GFP. Silencing of *PDX1* and *HNF-1A* in EndoC-βH1 cells [10] was achieved using 50 pmol of esiRNA (Eupheria, Dresden, Germany) with Dharmafect4 as the transfection reagent (GE Dharmacon, Lafayette, CO).

INS-1 832/13 cells were cultured in a humidified atmosphere containing 5% CO<sub>2</sub> in complete RPMI 1640 medium (Thermo Fisher Scientific Inc.) supplemented with 10% heat-inactivated fetal bovine serum, 1 mmol/l sodium pyruvate, 50 µmol/l 2-mercaptoethanol, 2 mmol/l glutamine, 10 mmol/l HEPES, 100 U/ml penicillin, and 100 µg/ml streptomycin. Silencing of *PPP1R1A*, *ARG2* and *TMEM37* in INS-1 832/13 cells was achieved by transfection with the respective siRNAs and Lipofectamine 3000 diluted in Opti-MEM. After incubation overnight, the cells were cultured in RPMI medium for 24 h. For cytoplasmic Ca<sup>2+</sup> imaging experiments, INS-1 832/13 cells were co-transfected with the fluorescent transfection marker siGLO RISC-Free siRNA to identify siRNA-transfected cells. For overexpression of *TMEM37-V5*, INS-1 832/13 cells were transfected with the corresponding pcDNA3.1 vector using Lipofectamine 2000. Four days after transfection, cells were harvested for immunoblotting and

immunocytochemistry. For  $\text{Ca}^{2+}$  imaging analysis, *TMEM37-V5* INS-1 832/13 cells were identified by co-transfection with pEGFP-C1 (Takara Bio Inc., Kusatsu, Japan).

*cDNA vectors.* The open reading frames for human *ARG2* (BCA001350), *PPP1R1A* (NM\_006741), and *TMEM37* (XM\_005263597, NM\_019432) were cloned into pcDNA3.1neo\_DEST. Human *TMEM37* was also cloned into pcDNA3.1neo\_3cMYC\_DEST, while mouse *Tmem37* (NM\_019432) was inserted into pcDNA3.1D/V5-His-Topo according to the manufacturer's instructions (Thermo Fisher Scientific Inc.). The forward and reverse primers are shown in ESM Table 1.

*Ca<sup>2+</sup> imaging.* INS-1 832/13 cells were grown on glass coverslips. The wide-field imaging system consisted of an Olympus IX70 multi-parameter fluorescence microscope, monochromator, and objective lens ( $\times 40/1.35\text{NA}$  oil UApo/340; Olympus). All imaging experiments were performed at  $37^\circ\text{C}$  in a heated perfusion chamber using pre-bubbled imaging solution (in mmol/l: 140 NaCl, 3.6 KCl, 0.5  $\text{NaH}_2\text{PO}_4$ , 0.5  $\text{MgSO}_4$ , 1.5  $\text{CaCl}_2$ , 10 HEPES and 2  $\text{NaHCO}_3$ , pH 7.4). The basal and loading solution contained 3 mmol/l glucose, essentially as previously described [11]. In imaging solution containing 20 mmol/l KCl, NaCl was reduced to 123.6 mmol/l (3 mmol/l glucose). Cytoplasmic (intracellular) free  $\text{Ca}^{2+}$  levels ( $[\text{Ca}^{2+}]_i$ ) were recorded using ratiometric  $\text{Ca}^{2+}$ -sensitive dyes. Cells were loaded for 40 min at  $37^\circ\text{C}$  with either 4  $\mu\text{mol/l}$  Fura Red or 4  $\mu\text{mol/l}$  Fura-2 AM in imaging solution containing 0.004% Pluronic (Thermo Fisher Scientific Inc.). After loading, the cells were washed in basal solution for  $\geq 20$  min to allow de-esterification of the dyes. Images were acquired using Micromanager software at a rate of 1 frame/3 sec. Cells were excited at 420 and 480 nm for Fura Red loaded cells and at 340 and 380 nm for Fura-2 AM loaded cells. The emitted light was passed through an ET525/50 filter equipped with a T495lpxr dichroic mirror for Fura-2 AM or an ET630/75 filter equipped with a T585lpxr dichroic mirror for Fura Red (Chroma, Bellows Falls, VT). Cells with responses of  $\geq 3$  standard deviations higher than the averaged baseline to both KCl and glucose stimuli and with an increase of  $\geq 10\%$  after an increase to 15 mmol/l glucose were considered responsive and were included in the analysis. The basal cytosolic  $\text{Ca}^{2+}$  concentration was calculated as the mean of the ratios measured over the first 150 s. The maximal fluorescent intensity value was taken as the peak amplitude. To calculate the cumulative fluorescence, curves were first smoothed using a fast Fourier transform filter and the baseline was subtracted. Then, the area under the curve was derived via integration.

*RT-qPCR.* Total RNA was extracted from human dispersed, FACS-sorted islet cells, rat INS-1 832/13 cells, and human EndoC-betaH1 cells using RNeasy kits according to the manufacturer's instructions (Qiagen) and then reverse-transcribed using Superscript Reverse Transcriptase II (Thermo Fisher Scientific Inc.). RT-qPCR was performed using GoTaq qPCR Master Mix (Promega, Madison, WI). The mRNA levels of the genes of interest in human islet dispersed cells were quantified and normalised to  $\beta$ -actin in a ViiA7 system (Applied Biosystems). The gene expression levels in INS-1 832/13 cells, EndoC-betaH1 cells and human islets were normalised to  $\beta$ -actin expression. The forward and reverse primers purchased from commercial suppliers are indicated in the table below.

*In situ RT-PCR.* Pancreatic sections from 10 non-diabetic and 10 age-matched type 2 diabetic OD and from 10 non-diabetic and 10 age-matched type 2 diabetic PPP were placed on three-

chamber slides. Briefly, after dewaxing and different pre-incubation steps, reverse transcription was performed with oligo-dT primers (Invitrogen), M-MLV reverse transcriptase (0.5 U/ $\mu$ l) (Invitrogen), and RNasin (Promega) for 1 h at 37°C in a humidified chamber. After inactivation of the reverse transcriptase, 15  $\mu$ l of PCR reaction mix containing 5% digoxigenin (DIG)-11-dUTP, the mRNA-specific primers and selfseal-reagent (BioRad) was applied to each chamber of the slide. The slides were sealed with coverslips and were placed into a PTC-200 DNA Engine thermal cycler with a slide block (BioRad, Munich, Germany) for *in situ* RT-PCR, as previously described [12, 13]. Amplification for 12 (*ARG2*, *ASCL2*, *CHL1* [*CHL1iso-1*; *CHL1iso-2*, *CHL1iso-3*], *FAM102B*, *FFAR4A*, *HHATL*, *KCNH8*, *PPP1R1A*, *SCTR*, *SCL2A*, *TMEM37* and *UNC5D*) out of the 19 signature genes of type 2 diabetic islets was performed according to the following protocol: initial denaturation at 95°C for 3 min, followed by 35–40 cycles with a denaturation step at 95°C for 45 sec, annealing at 57°C for 45 s and extension at 72°C for 45 s, followed by a final extension for 10 min at 72°C. The primers are indicated in ESM Table 3. After a blocking step, the incorporated DIG-labelled nucleotides were detected by incubation with ABC-AP goat IgG and a goat anti-digoxigenin antibody (Enzo Life Sciences, Lörrach, Germany) (1:500) at room temperature for 1 h. Slides were developed with nitroblue tetrazolium chloride/5-bromo-4-chloro-3-indolyl phosphate toluidine salt for 1 h at room temperature and counterstained with haematoxylin.

**Immunoblotting.** The protein concentration of each extract was determined using the BCA assay (Thermo Fisher Scientific Inc.). Extracted proteins (20  $\mu$ g/lane) were separated on 12% SDS-PAGE and transferred onto polyvinylidene difluoride membranes (GE Healthcare Europe, Little Chalfont, UK). Membranes were probed with mouse monoclonal anti-V5 (R960-25, Thermo Fisher Scientific Inc.), mouse monoclonal anti-gamma-tubulin (T6557, Sigma-Aldrich), rabbit polyclonal anti-PDX1 (07-696, Merck Millipore, MA), and rabbit polyclonal anti-HNF1A (ab174653, Abcam).

**Immunomicroscopy.** Human pancreatic samples from OD were taken before islet isolation, fixed in 4% paraformaldehyde and embedded in paraffin, essentially as previously described [14]. Surgical pancreatic specimens were immediately fixed after collection with 4% paraformaldehyde in PBS and embedded in paraffin. For cryosections, small tissue fragments were embedded in TissueTek, snap frozen, and stored at –80°C. Formalin-fixed, paraffin-embedded tissue sections (2–3-mm-thick) were stained with the following primary antibodies: guinea pig polyclonal anti-insulin (ab7842, 1:1,000), rabbit monoclonal anti-PPP1R1A (ab40877, 1:200), and rabbit polyclonal anti-TMEM37 (ab111287, 1:30) (all from Abcam); mouse monoclonal anti-glucagon (G2654, 1:3,000), and rabbit polyclonal anti-ARG2 (1:25) (both Sigma-Aldrich). After adding fluorochrome-conjugated secondary antibodies, the sections were imaged using a Leica 1DM5500B microscope (Leica, Wetzlar, Germany) or a Scanscope FL instrument (Roche) to image the TMEM37 staining profile. EndoC-betaH1 cells grown on coverslips were fixed with 4% paraformaldehyde and immunostained with the following primary antibodies: mouse monoclonal anti-insulin (I2018, Sigma-Aldrich), guinea pig polyclonal anti-PDX1 (ab47308, Abcam), and rabbit polyclonal anti-HNF1A (A304-052A, Bethyl Laboratories, Montgomery, TX). Nuclei were counterstained with DAPI (Sigma Aldrich), and coverslips were mounted with Mowiol (Calbiochem/EMD Millipore, Darmstadt, Germany). Images of 0.5- $\mu$ m-thick optical sections were acquired at room temperature with an inverted confocal microscope (Zeiss Axiovert 200M) equipped with a Plan-Apochromat  $\times$ 63 oil objective (numerical aperture

1.4), a Zeiss LSM510 scan head with photomultiplier tubes, and analysed using Zeiss LSM 510 AIM software version 4 (Zeiss, Göttingen, Germany).

*Chromatin immunoprecipitation.*  $2 \times 10^7$  EndoC-betaH1 cells grown in T75 flasks were cross-linked with 10 ml of 1% formaldehyde for 30 min and then quenched with 1.25 ml 1M glycine for 10 min. Cells were resuspended in nuclear lysis buffer and sonicated with 20 pulses of 20 s each with breaks of 20 s between each sonication cycle to achieve fragments ranging in size between 200 and 2,000 bp. The sonicated cells were diluted 10-fold, centrifuged for 10 min at  $13,000 \times g$ . Rabbit polyclonal anti-PDX1 (Merck Millipore) and anti-HNF1A (Abcam) antibodies and control rabbit IgG (Dianova, Hamburg, Germany) were used at 10  $\mu\text{g/ml}$  for ChIP analysis. Purified DNA was analysed by RT-PCR (Aria Mx cycler, Agilent Technologies) using 1  $\mu\text{l}$  of DNA as template in 20  $\mu\text{l}$  reaction carried out in triplicate. The primer concentration was 100 nM and their sequences are indicated in ESM Table 4.

## Data analysis

*Normalisation and statistical analysis of microarray data.* The transcriptomics data were summarised and normalised by Robust Multi-array Average (RMA) in Array Studio software (Omicsoft Corp., Cary, NC). Batch correction of microarray data was performed using the R/Bioconductor package ComBat [15, 16]. Elimination of technical outlier samples was performed at two steps of the transcriptomics analysis (Fig. 5a). Briefly, before batch correction and statistical analysis, the array data were filtered to detect genes showing significant expression. The criterion for expression was an intensity value of  $>75\%$  for  $\geq 25\%$  of the samples in that group. Subsequently, islet samples from OD with no previous history of diabetes but with high blood fructosamine ( $>285 \mu\text{mol/l}$ ) or glucose ( $>11.1 \text{ mmol/l}$ ) were excluded from the analysis to avoid the impact of confounding factors, such as hyperglycaemia caused by the patient's stressful clinical situation. Islet samples from non-diabetic and type 2 diabetic OD with insulin expression levels below one standard deviation from the within-group mean were also eliminated. Covariate correction for age and sex, as well as the statistical analyses, were performed using the linear modelling features of the R/Bioconductor package Limma [17]. In comparisons between type 2 diabetic OD and non-diabetic OD islets, significant differences were defined as a change in expression of  $\geq 1.5$  after correction for multiple hypothesis testing using the Benjamini–Hochberg method ( $p \leq 0.05$ ). Principal component analysis was performed using the R package prcomp. The analysis of all islet sample types and of a single sample type (islets from OD or PPP) was based on the intensities of the probe sets after batch correction. Contamination of islet samples with exocrine pancreatic tissue was determined using selected markers of exocrine and ductal cells, as indicated in ESM Table 5. A meta-analysis against pancreatic cancer signatures was then performed, as described in ESM results.

*Gene ontology overrepresentation analysis of differentially expressed genes.* The Bioconductor package GStats [18] was used to test for the association between the biological process gene ontology terms and the lists of differentially expressed genes in islets of OD and PPP. For differentially expressed genes, a FDR threshold of 0.05 and an absolute fold-change threshold of 1.5 were used. A significance threshold of  $p \leq 0.05$  and a minimum number of three genes per term were used in the gene ontology-based over-representation analyses.

*Enrichment of genes involved in insulin secretion.* Enrichment analyses of upregulated and downregulated genes were performed against gene ontology categories for OD islets (208 upregulated and 400 downregulated probe sets) and PPP islets (128 upregulated and 80 downregulated probe sets). Statistical significance was calculated using a one-sided Fisher's exact test.

*Pathway analysis of differentially expressed genes.* Putatively active pathways, downstream processes, and upstream regulators were determined by IPA (Ingenuity® Systems) (18). A FDR threshold of 0.05 and an absolute fold-change threshold of 1.5 were used to identify differentially expressed genes in OD islets. The absolute fold-change threshold was relaxed to 1.2 to identify differentially expressed genes in PPP islets. The enriched canonical pathway analyses were performed with a threshold of  $p < 0.05$ . Only pathways containing at least three regulated genes were considered. An absolute z-score threshold of 2 and a threshold  $p < 0.05$  were applied to predict increased/decreased downstream processes and activated/inhibited upstream regulators [19].

*Prediction of binding sites for HNF1A and PDX1 in type 2 diabetic islet signature genes.* Type 2 diabetic islet signature genes were searched for the inclusion of putative binding sites for HNF1A and PDX1 within 5 kb upstream and downstream of their respective transcription start site using oPOSSUM 3.0 (ESM Table 14).

*Identification of gene co-expression modules from OD-islet and PPP-LCM samples.* Module generation was performed using Weighted Gene Correlation Network Analysis (WGCNA) [20]. With WGCNA, weighted correlations are calculated between genes based on the gene's expression in the different samples; a weighted correlation is a correlation raised to a certain power (called the soft thresholding power). In WGCNA, the weighted correlations are used to create a specific type of network (a topological overlap network). This network is based on network topology rather than direct correlations between genes: genes are strongly linked together in this network if they share many correlated neighbours with each other. This topological overlap network is then analysed to identify network modules of genes that are strongly linked together. Identifying network modules from the gene expression in this way focuses on groups of genes that are predicted to be functionally related based only on the gene expression data.

WGCNA was performed on genes from 84 OD-Islet and 32 PP-LCM samples from non-diabetic subjects. The non-diabetic samples were chosen so that the gene-gene correlations would not be driven by differences between type 2 diabetic and non-diabetic sample groups and would rather reflect putative functional links between genes. Normalised expression data was first batch corrected using *ComBat* [16] and corrected for age and sex effects by linear regression using *LmFit* from the *limma* package in R [17]. Both sets of data were then filtered by calculating a co-variance matrix and removing the 25% least co-variant genes. Co-expression networks were constructed by calculating adjacency matrices for each data set using a soft-thresholding power of 7 and Spearman correlation using pairwise complete observations. A topological overlap matrix (TOM) was then calculated from each adjacency matrix, converted to distances, and clustered by hierarchical clustering using average linkage clustering. Modules were identified by dynamic tree cut with a cut height of 0.995 with a minimum module size=20, using the hybrid

method. Module *eigengenes* were calculated and similar modules were merged together using a module *eigengene* distance of 0.15 as the threshold.

*Generation of a trait module network linking OD-islet with PPP-LCM modules.* Since one of the main goals of our study was to investigate type 2 diabetes-related genes in two different sample collections, we measured similarities at the level of the gene co-expression modules. To do this we compared each OD-islet with each PPP-LCM module pairwise and calculated the significance of enrichment using a one-sided Fisher's exact test. ESM Fig. 12 is a heatmap showing the pairwise module overlaps. Red indicates that a pair of modules has a significant number of overlapping genes. From the figure, it is clear that a number of modules significantly overlap between the two sample types.

We next correlated the *eigengenes* (the first principal components) of the modules to clinical and functional traits specific to each sample type using Spearman correlation (pairwise complete observations) and calculated corresponding  $p$ -values for the correlations using the *cor.test* function in R. The traits that were correlated to the module *eigengenes* are shown in ESM Table 17.

We identified the modules that were most correlated with the traits by applying an unadjusted cutoff of  $p \leq 0.05$ . These module-trait correlations were then plotted as separate heatmaps for OD and PPP modules (ESM Figs. 11, 6-8).

The module-module overlaps and the module-trait correlations were combined together into a module-trait network, where modules and traits were represented as nodes and module-module enrichment scores ( $-\log_{10} p$ -value) and module-trait correlations represented the edges (ESM Fig. 8). The network was constructed by creating an edge between two modules if the  $p$ -value (adjusted) for enrichment was  $\leq 0.05$ , or between a module and a trait if the module-trait correlation was considered as significant (unadjusted  $p$ -value  $\leq 0.05$ ). The largest connected component in this network comprised a set of 10 modules (4 from OD islets and 6 from PPP islets) that were connected to each other either because the modules were significantly overlapping, or because the modules were correlated to the same traits within the OD and PPP datasets (ESM Fig. 11). These modules were used as a starting point for further analysis described below.

*Significance of gene co-expression modules.* We tested the significance of the co-expression modules by performing a bootstrap test as follows. For each selected module of size  $N$ , we randomly sampled  $N$  probe sets from the expression data 1000 times and calculated the intramodular connectivity [19] (the connectivity of nodes to other nodes within the same module) of the probe sets. To measure the degree of connectivity within the modules compared to the background, we calculated a  $Z$ -score as:

$$Z = \frac{k - \mu}{\sigma}$$

where  $k$  is the intra-modular connectivity and  $\mu$  and  $\sigma$  are the mean and standard deviation of intramodular connectivity from 1000 randomly sampled modules of size  $N$  respectively. Empirical  $p$ -values were also calculated as the fraction of background intramodular connectivity



scores greater than or equal to the intramodular connectivity for a particular module. All of the background intramodular connectivity scores were below the module intramodular connectivity for the selected modules.

*Significance of selected OD and PPP modules.* The Z-score is a measure of the number of standard deviations of the intramodular connectivity of probesets within a module above a background model based on 1000 samples of the same size. The results in the ESM Table 18 show that all of the selected modules have high Z-scores, indicating that it is extremely unlikely to find modules of the same size and connectivity by chance from the expression data

*Identification of module hub genes and measuring overlap with signature genes.* A hub gene is a highly connected gene within a module that could be influencing a particular trait. Such genes might therefore represent key genes that could have a stronger influence on a trait compared to other genes. Hub genes were selected for each significantly correlated module/trait pair in the module-trait network (ESM Fig. 8) as those that correlated with the modules *eigengene*, the first principal component of the module (Spearman's  $r \geq 0.6$ ), and the trait (Spearman's  $r \geq 0.3$ ). We tested the hub genes for enrichment of the 19 genes differentially regulated in both OD and PPP cohorts using the hypergeometric distribution in R (*hyperg* function) with the background number of genes equal to the union of the numbers of expressed genes in OD and PPP cohorts ( $N=15716$ ). The total number of module hub genes was 4285. We found 15 of the 19 signature genes were hub genes in these modules and this is statistically significant (hypergeometric  $p=3.34 \times 10^{-5}$ ). These signature 'hub' genes are: *ARG2*, *CHL1*, *PPP1R1A*, *CD44*, *HHATL*, *ANKRD23/39*, *ASCL2*, *UNC5D*, *PCDH20*, *FBXO32*, *SCTR*, *G6PC2*, *TMEM37* and *SLC2A2*. Four of the signature genes *CAPN13*, *FFAR4*, *NSG1* and *FAM102B* were not module 'hub' genes.

*Generation of a sequence-based transcription factor network.* We reasoned that the hub genes could also be targets for transcription factors (TFs) affecting a particular trait, since these genes are both highly connected to other module genes and are also correlated to glycaemia-related traits. In order to identify possible TFs upstream of the modules we analysed the promoters of the 4285 module hub genes for the presence of transcription factor binding sites (TFBS) using oPOSSUM 3.0 single site analysis [21]. The promoter regions used in the analysis were from 2000 nucleotides upstream of the TSS to the TSS of each gene. All vertebrate JASPAR profiles with a minimum specificity of 8 bits were used for the analysis. TFs were selected showing significant binding site enrichment measured by both empirical Z-score and Fisher score cutoffs (Z-score  $\geq 10$  AND Fisher score  $\geq 7$ ).

The oPOSSUM results for each significantly enriched TF were parsed to create a directed network of TFs and their predicted targets. The TFs were also analysed separately using oPOSSUM to detect potential binding events between TFs (ESM Table 19). Here, no Z-score or Fisher score cutoff was used because the goal was not to test for enrichment, but rather to identify potential TF-TF regulation. A directed network was created for each module-trait combination with genes as nodes and edges between nodes representing evidence of binding-site prediction. Subsequent network analysis was performed in R using *iGraph* [22].

*Generation of a literature-based transcription factor network.* Literature-based networks were created for the same module-trait gene sets using Ingenuity upstream regulator analysis [19]. To do this, significant of overlap between the gene sets and known targets of transcriptional regulators from the literature were calculated using Fisher's exact test. Significant regulators were identified as those with an overlap  $p$ -value  $\leq 0.01$ . The predicted upstream regulators were then filtered to select only those that were transcription factors. A directed network was created for each module-trait combination with genes as nodes and edges between nodes representing predicted transcriptional regulation. Subsequent network analysis was performed in *R* using *iGraph* [22].

*Merging of sequence-based and literature-based Transcription Factor networks.* We reasoned that TF-target gene relationships that were predicted by both a sequence-based and a literature-based approach would constitute robust predictions of upstream regulators of the trait-associated modules. We therefore created a network combining the information from the literature-based and sequence-based networks. To do this, the individual module networks were merged to create a single literature-based, and a single sequence-based network by taking the union of all of the edges in the individual module networks. The literature and sequence-based networks were then combined to create a network containing only the intersecting edges. Hive plots [23] (Fig. 5b) were created for the sequence-based, the literature-based and the intersection network using the *HiveR* package in *R* (<https://github.com/bryanhanson/HiveR>). Network visualisation (Fig. 5c) was performed using Gephi (<http://gephi.github.io/>).

*Processing and analysis of RNA-Seq data from islets exposed ex vivo to hyperglycaemia.* Single end reads (75 bp) were aligned on hg19 using tophat and bowtie2 (v 2.0.11 and v. 2.2.1, respectively) and using samtools (v. 0.1.19) for sorting of alignment files. Read counts per gene were then generated using htseq-count (v. 0.5.4p3) and GRCh37.75 Ensembl annotation. Differentially expressed genes were detected using two different methods: DESeq2 and Limma in *R*. For DESeq2, single end reads (75 bp) were aligned on hg38 using GSNAP (v2017-03-17) and Ensembl annotation 87 was used to detect reads spanning splice sites. The uniquely aligned reads were counted with featureCounts (v1.5.2) and the same Ensembl annotation. The raw counts were normalised based on the library size and testing for differential gene expression between the two conditions, samples treated with glucose versus control, was performed with the DESeq2 *R* package (v1.15.51). For Limma, the raw count data were first filtered for an average of at least 5 reads in all the samples, normalised to library size using edgeR (v. 3.16.5) TMM method, and then transformed to log<sub>2</sub>-cpm (counts per million reads) using the *voom* function in *R*. Empirical Bayes moderated  $t$  statistics and corresponding  $p$ -values were then computed comparing the samples treated with glucose to controls using the Limma package. The  $p$ -values were adjusted for multiple comparisons using the Benjamini–Hochberg procedure.

Differential expression results as log<sub>2</sub> fold change (log<sub>2</sub>FC) and adjusted  $p$ -values (adjP) for DESeq2 and Limma methods for the 19 signature genes are shown in ESM Table 9. *ARG2*, *PPP1R1A*, *CHL1*, *FBX032* and *SLCA2* are predicted to be significantly differentially expressed between glucose-treated and non-treated samples (adjusted  $p \leq 0.05$ ) using DESeq2 and show a tendency for regulation with Limma, although for the latter method this is not statistically significant after correction for multiple comparisons. Confirmation with more samples will be required to better ascertain the precise regulation of these genes in islets upon glucose treatment.

*Meta-analysis against pancreatic cancer cell signatures.* To define whether our results were influenced by potential contamination of PPP islet samples with cancer cells, we used data from a recent study, which identified the transcriptome of four pancreatic cancer subtypes [24]. Comparing the differentially regulated genes from PPP islets to the signatures from each of the four cancer subtypes (as defined by statistical comparison of each subtype with the three others) revealed no enrichment of differentially regulated genes with ADEX, Immunogenic or Progenitor subtype signatures (ESM Table 15). A small but significant enrichment with the squamous signature was found, which however was also present for OD samples (OD  $p=4.75\times 10^{-6}$  for UP-regulated genes; PPP  $p=8.4\times 10^{-4}$  for UP-regulated genes; OD  $p=1.46\times 10^{-7}$  for DOWN-regulated genes; PPP  $p=3.32\times 10^{-5}$  for DOWN-regulated genes; ESM Table 9), suggesting that this signature, which contains 2,366 genes (ESM Table 9) and is the largest among the four cancer signatures, is more related to islet cells than to the other cancer subtypes. There are a few genes in the squamous cell signature that are differentially regulated in both OD and PPP. These genes are CAPN13, PCDH20, SCTR and TMEM37 (DOWN-regulated) and CD44 (UP-regulated). The fact that these genes are regulated in both OD and PPP suggests that they are more closely related to endocrine tissue rather than cancer tissue.

**ESM Table 1 Primers used to prepare cDNA vectors**

| <b>Gene</b>    | <b>Accession no (NCBI)</b> | <b>Species</b> | <b>Forward primer</b>                   | <b>Reverse primer</b>                 |
|----------------|----------------------------|----------------|-----------------------------------------|---------------------------------------|
| <i>ARG2</i>    | BC001350.1                 | Human          | 5'-<br>ATGTCCCTAAGGGGC<br>AGCC-3'       | 3'-<br>GTTCGTGCACACTCTTA<br>AATC-5'   |
| <i>PPP1R1A</i> | NM_006741                  | Human          | 5'-<br>ATGGAGCAAGACAAC<br>AGCCC-3'      | 3'-<br>CCCTCGGTTGAGCCAG<br>ACT-5'     |
| <i>TMEM37</i>  | XM_00526359<br>7           | Human          | 5'-<br>ATGACCCGACCTGAC<br>TGTC-3'       | 3'-<br>GTGGGTAGGGACCCTT<br>ACT-5'     |
| <i>Tmem37</i>  | NM_019432                  | Mouse          | 5'-<br>CACCATGACGGCCAT<br>CGGCGCGCAG-3' | 3'-<br>TATCAGAGAAGTCCCA<br>TCATAAC-5' |

**ESM Table 2 RT-qPCR primers**

| <b>Gene</b>    | <b>Accession no (NCBI)</b> | <b>Forward primer</b>                    | <b>Reverse primer</b>                  |
|----------------|----------------------------|------------------------------------------|----------------------------------------|
| <i>ACTB</i>    | NM_001101                  | 5'-<br>CATCGAGCACGGCATCG<br>TCAC-3'      | 5'-<br>CAGCACAGCCTGGATAGCA<br>ACG-3'   |
| <i>ANKRD23</i> | NM_144994                  | 5'-<br>GTTGGTAAGTGGAGAAA<br>GAGTTG-3'    | 5'-<br>TCTTTGAACCAAGTTTTCCA<br>AGTC-3' |
| <i>ANKRD39</i> | NM_016466                  | 5'-<br>ACGCTGGAGGAGATGGA<br>CTTC-3'      | 5'-<br>CTTATGCAGACTGGTCATG<br>CC-3'    |
| <i>ARG2</i>    | NM_001172                  | 5'-<br>CCTCCTGAACATTTTATT<br>TTAAAG-3'   | 5'-<br>GGATTGACTTCAACAAGAT<br>CCAG-3'  |
| <i>ASCL2</i>   | NM_005170                  | 5'-<br>TGCGCTGCAGCCGGCGG<br>CGGCG-3'     | 5'-<br>CGTGCGGCACGTGCTGCCG<br>CAGCG-3' |
| <i>CAPN13</i>  | NM_144575                  | 5'-<br>CTGGTGGACCTCACAGG<br>AGG-3'       | 5'-<br>CATCCAAAACCTCGCCATCT<br>TCC-3'  |
| <i>CD44</i>    | NM_000610                  | 5'-<br>CATGGACAAGTTTTGGTG<br>GCAC-3'     | 5'-<br>CCTTCTATGAACCCATACC<br>TGC-3'   |
| <i>CHL1</i>    | NM_006614                  | 5'-<br>GTACATTAGTTAAAGTTA<br>CCTGGTC-3'  | 5'-<br>GTGGCAGTGTCTTTATCAA<br>CTTTG-3' |
| <i>FAM102B</i> | NM_001010883               | 5'-<br>TTTGCTGGATCAGGAAAT<br>ACCAC-3'    | 5'-<br>CTTTGCTGAAAGATCTGCT<br>ATTCC-3' |
| <i>FBXO32</i>  | NM_058229                  | 5'-<br>TACAACCTGAACATCATGC<br>AGAGG-3'   | 5'-<br>TACATCTTCTTCCAATCCAG<br>CTG-3'  |
| <i>FFAR4</i>   | NM_181745                  | 5'-<br>AGCCTGGAGCGCATGGT<br>GTG-3'       | 5'-<br>GAGTAACTGATCACAATGA<br>CCAG-3'  |
| <i>G6PC2</i>   | NM_021176                  | 5'-<br>TTTTATGTCCAATGTTGG<br>AGACC-3'    | 5'-<br>TGCCAGATGGACTTCCTG<br>G-3'      |
| <i>HHATL</i>   | NM_020707                  | 5'-<br>GTGGTCTGTTCTTAACTG<br>CTTC-3'     | 5'-<br>GGAAGCCTGTAAGTATCAG<br>GC-3'    |
| <i>HNF1A</i>   | NM_000545                  | 5'-<br>CACCAGAAAGCCGTGGT<br>GGAG-3'      | 5'-<br>GGAACAGGATCTGCTGGGA<br>TG-3'    |
| <i>KCNH8</i>   | NM_144633                  | 5'-<br>AATTCAAAGGAGAAATT<br>ATGTTCTAC-3' | 5'-<br>GTCTCCGGGCTGAGTCAAA<br>GTG-3'   |
| <i>NSG1</i>    | NM_014392                  | 5'-<br>TCACCGAGAGGTTTAAG                 | 5'-<br>TCCCGGGCACTGGAGTCTT             |

|                |           | GTCTC-3'                               | G-3'                                   |
|----------------|-----------|----------------------------------------|----------------------------------------|
| <i>PCDH20</i>  | NM_022843 | 5'-<br>TTTTTCCTTAGACAGTGTC<br>ACAGG-3' | 5'-<br>GGACTGTTGTCATTTTTATC<br>CAAC-3' |
| <i>PDX1</i>    | NM_000209 | 5'-<br>CAAAGCTCACGCGTGGA<br>AAGG-3'    | 5'-<br>GATGTGTCTCTCGGTCAAG<br>TTC-3'   |
| <i>PPP1R1A</i> | NM_006741 | 5'-<br>CAATGTCTCCACGGCAAC<br>GGAAG-3'  | 5'-<br>CTGTGTCTGGGATCCCAGG<br>TG-3'    |
| <i>SCTR</i>    | NM_001980 | 5'-<br>CAACTACATCCACATGCA<br>CCTG-3'   | 5'-<br>AATGGCTGGAGAACCCCAT<br>CC-3'    |
| <i>SLC2A2</i>  | NM_000340 | 5'-<br>TTCTGTCCAGAAAGCCCC<br>AG-3'     | 5'-<br>GCCCTGCCTTCTCCACAAG-<br>3'      |
| <i>TMEM37</i>  | NM_183240 | 5'-<br>TCCTTCATCCGGACCCTC<br>ATCATC-3' | 5'-<br>GAGGAAGGAGGCAGTGAA<br>TTC-3'    |
| <i>UNC5D</i>   | NM_080872 | 5'-<br>CTTTTGTGAGGGAATGTC<br>AGTG-3'   | 5'-<br>TTGGGGTTTTATTCATGAA<br>GAGG-3'  |

**ESM Table 3 Primers for *in situ* RT-PCR**

| Gene             | Accession no (NCBI) | Forward primer                       | Reverse primer                       |
|------------------|---------------------|--------------------------------------|--------------------------------------|
| <i>ARG2</i>      | NM_001172           | 5'-<br>TGGTTAGCAGAGCTGT<br>GTCAGA-3' | 5'-<br>TTGGTCTTTGTCTCTTGCC<br>AAT-3' |
| <i>ASCL2</i>     | NM_005170           | 5'-<br>GGTGAACTTGGGCTTC<br>CAG-3'    | 5'-<br>CCCTAACCAGCTGGAGAA<br>GTC-3'  |
| <i>CHL1-iso1</i> | NM_006614           | 5'-<br>ATCTCCACTCAAGGCT<br>GGTTT-3'  | 5'-<br>TCCATTGCTTTCAACAGAT<br>CC-3'  |
| <i>CHL1-iso2</i> | NM_001253387        | 5'-<br>TGGTCAACAGTTCCAA<br>AGGAC-3'  | 5'-<br>CTGGGCTTTGATGGAGTT<br>GTA-3'  |
| <i>CHL1-iso3</i> | NM_001253388        | 5'-<br>TCCATCGAACAATTCA<br>GGAAC-3'  | 5'-<br>TCATTGCGACTGTCCTTTT<br>CT-3'  |
| <i>FAM102B</i>   | NM_001010883        | 5'-<br>TACAAGCAAAGTGTGT<br>TCGCTG-3' | 5'-<br>TTCTAGAATGTCCACAGG<br>CACC-3' |
| <i>FFAR4</i>     | NM_181745.3         | 5'-<br>AGGAAATTCGATTG<br>CAACT-3'    | 5'-<br>TCTTGCTTGAAGTTCTGGA<br>TCA-3' |
| <i>HHATL</i>     | NM_020707           | 5'-<br>TGATGTGGTTCACCTCC<br>TTTC-3'  | 5'-<br>CTTGAGCAGGTCAGCTAA<br>GGA-3'  |
| <i>KCNH8</i>     | NM_144633           | 5'-<br>GCCTATATTGCCGCTCT<br>GTA-3'   | 5'-<br>CGGAGCACAGAAAGAGG<br>TTTTG-3' |
| <i>PPP1RIA</i>   | NM_006741           | 5'-<br>TGACCAGTCATCCCCA<br>GAGATA-3' | 5'-<br>GGAATCCAGTGGTGGTAT<br>ATGG-3' |
| <i>SCTR</i>      | NM_002980           | 5'-<br>GGAAGGCCTCTACCTT<br>CACAC-3'  | 5'-<br>ACGATGTAGTGGATGCCA<br>AAG-3'  |
| <i>SLC2A2</i>    | NM_000340           | 5'-<br>GATCAATGCACCTCAA<br>CAGG-3'   | 5'-<br>CCAATTTTGAAAACCCCA<br>TC-3'   |
| <i>TMEM37</i>    | NM_183240           | 5'-<br>CGGTCCTTCTTTGAATC<br>CTTC-3'  | 5'-<br>ATTAGGGTGAAGCCGATG<br>AGT-3'  |
| <i>UNC5D</i>     | NM_080872.2         | 5'-<br>AGGGAATGTCAGTGCA<br>GAAAAT-3' | 5'-<br>ACCTGTCAATGCAGAAGA<br>GTCA-3' |

**ESM Table 4 Primers for chromatin immunoprecipitation**

| Gene              | Ensemble ID                         | Forward primer                        | Reverse primer                       |
|-------------------|-------------------------------------|---------------------------------------|--------------------------------------|
| <i>ANKRD23/39</i> | ENSG00000163126/<br>ENSG00000213337 | 5'-<br>CAGCTGGATAGCAGG<br>TCCCG-3'    | 5'-<br>TCCTCCTGCAACACA<br>GCCCA-3'   |
| <i>ARG2</i>       | ENSG00000081181                     | 5'-<br>CCAGCGCTCCCGTTA<br>TTCAGG-3'   | 5'-<br>AATCTTCACGCCCGG<br>CTGATG-3'  |
| <i>CAPN13</i>     | ENSG00000162949                     | 5'-<br>CTGTGGGCTCAGTGC<br>AAGCACTG-3' | 5'-<br>GGGAAGATCACGAGA<br>ATCCTC-3'  |
| <i>CD44</i>       | ENSG00000026508                     | 5'-<br>CAGGTTCCGGTCCGCC<br>ATCCT-3'   | 5'-<br>CCCAGGCTGCGTGCC<br>ACCAA-3'   |
| <i>CHL1</i>       | ENSG00000134121                     | 5'-<br>CGAGGCTGTAAGGTC<br>AATCTC-3'   | 5'-<br>GCAAGTCCTCTTTGTT<br>GG-3'     |
| <i>FAM102B</i>    | ENSG00000162636                     | 5'-<br>GGGCAACAGAGTAAG<br>ACTCTG -3'  | 5'-<br>GCCTCAGTTGAATAG<br>ACCACCA-3' |
| <i>FBXO32</i>     | ENSG00000156804                     | 5'-<br>ACCGCCAGTCCTGCC<br>CGAGG-3'    | 5'-<br>AGCATCCGCCCCGGG<br>TGGCA-3'   |
| <i>G6PC2</i>      | NSG00000152254                      | 5'-<br>TTCAGCAGAGGAGGG<br>CTGGT-3'    | 5'-<br>AAGTGCTCTGATTCCC<br>ACCG-3'   |
| <i>KCNH8</i>      | ENSG00000183960                     | 5'-<br>ACGGAGAGGGAACA<br>AAGGGG-3'    | 5'-<br>GCTGAGCCTCCCGGT<br>CTCCA-3'   |
| <i>PCDH20</i>     | ENSG00000197991                     | 5'-<br>GGGGCTGTACATGGA<br>GTTCA-3'    | 5'-<br>GGGGCTGAGGTTTAC<br>CACTTC-3'  |
| <i>PPP1R1A</i>    | ENSG00000135447                     | 5'-<br>AACCTTAACCCCGTC<br>GTGGCT-3'   | 5'-<br>AGCTGTCCACTACGA<br>CGGCT-3'   |
| <i>SCTR</i>       | ENSG00000080293                     | 5'-<br>CGTCAGATCCAGCAG<br>TGAGT-3'    | 5'-<br>GGCACCCAGCATTCC<br>TGTTG-3'   |
| <i>SLC2A2</i>     | ENSG00000163581                     | 5'-<br>TGCTGATACCAGCCG<br>TCTGA-3'    | 5'-<br>GTTCTAGGGTGCATG<br>CCGCT-3'   |
| <i>UNC5D</i>      | ENSG00000156687                     | 5'-<br>ACGTGGAGCGGCCTC<br>TGGCT-3'    | 5'-<br>GCCAATGAGCCGGGC<br>TGGGG-3'   |



**ESM Table 5 Determination of islet contamination**

| Annotation  |            |                 |                                                                                                   | Log intensities |        |        |         |
|-------------|------------|-----------------|---------------------------------------------------------------------------------------------------|-----------------|--------|--------|---------|
| Probe ID    | Entr ez ID | Symbol          | Gene name                                                                                         | OD-ND           | OD-T2D | PPP-ND | PPP-T2D |
| 209301_at   | 760        | <i>CA2</i>      | Carbonic anhydrase II                                                                             | 8.709           | 8.913  | 7.326  | 7.649   |
| 206208_at   | 762        | <i>CA4</i>      | Carbonic anhydrase IV                                                                             | 6.102           | 6.006  | 6.385  | 6.403   |
| 205043_at   | 1080       | <i>CFTR</i>     | Cystic fibrosis transmembrane conductance regulator (ATP-binding cassette sub-family C, member 7) | 11.702          | 12.016 | 9.516  | 9.943   |
| 206297_at   | 11330      | <i>CTRC</i>     | Chymotrypsin C (caldecrin)                                                                        | 12.545          | 12.543 | 12.575 | 12.442  |
| 220275_at   | 50624      | <i>CUZD1</i>    | CUB and zona pellucida-like domains 1                                                             | 12.655          | 12.828 | 11.526 | 11.734  |
| 214324_at   | 2813       | <i>GP2</i>      | Glycoprotein 2 (zymogen granule membrane)                                                         | 11.657          | 11.741 | 12.346 | 12.220  |
| 200697_at   | 3098       | <i>HK1</i>      | Hexokinase 1                                                                                      | 9.022           | 9.183  | 6.543  | 6.773   |
| 202934_at   | 3099       | <i>HK2</i>      | Hexokinase 2                                                                                      | 9.339           | 9.560  | 5.850  | 6.483   |
| 201650_at   | 3880       | <i>KRT19</i>    | Keratin 19                                                                                        | 12.606          | 12.749 | 8.176  | 8.488   |
| 208949_s_at | 3958       | <i>LGALS3</i>   | Lectin, galactoside-binding, soluble, 3                                                           | 12.036          | 12.156 | 8.908  | 9.590   |
| 213693_s_at | 4582       | <i>MUC1</i>     | Mucin 1, cell surface associated                                                                  | 12.672          | 12.846 | 9.655  | 10.023  |
| 217109_at   | 4585       | <i>MUC4</i>     | Mucin 4, cell surface associated                                                                  | 6.160           | 6.820  | absent | absent  |
| 205912_at   | 5406       | <i>PNLIP</i>    | Pancreatic lipase                                                                                 | 13.594          | 13.533 | 13.440 | 13.197  |
| 206694_at   | 5407       | <i>PNLIPRPI</i> | Pancreatic lipase-related protein 1                                                               | 12.107          | 12.239 | 11.687 | 11.512  |
| 205869_at   | 5644       | <i>PRSSI</i>    | Protease, serine, 1 (trypsin 1)                                                                   | 12.915          | 12.929 | 12.585 | 12.346  |
| 211429_s_at | 5265       | <i>SERPINA1</i> | Serpin peptidase inhibitor, clade A (alpha-1 antiproteinase, antitrypsin), member 1               | 13.354          | 13.360 | 13.006 | 13.287  |
| 202936_s_at | 6662       | <i>SOX9</i>     | SRY (sex determining region Y)-box 9                                                              | 11.118          | 11.786 | 9.042  | 9.062   |
| 209875_s_at | 6696       | <i>SPP1</i>     | Secreted phosphoprotein 1                                                                         | 12.732          | 13.023 | 9.627  | 10.759  |

OD, organ donors; ND, non-diabetic subjects; T2D, type 2 diabetes; PPP, phenotyped pancreatectomised patient.

**ESM Table 6 Clinical characteristics of the global IMIDIA cohorts of organ donors (OD) and phenotyped pancreatectomized patients (PPP)**

|                               | Sex<br>(F/M) | Age<br>(years) | BMI<br>(kg/m <sup>2</sup> ) | Diabetes<br>duration<br>(years) | Blood<br>glucose<br>in ICU<br>(mmol/l) | Fasting<br>glucose<br>(mmol/l) | HbA <sub>1c</sub> (%)<br>[mmol/mol] | Blood glucose<br>at 2 h in the<br>OGTT<br>(mmol/l) | Histopathology          |                  |                  |
|-------------------------------|--------------|----------------|-----------------------------|---------------------------------|----------------------------------------|--------------------------------|-------------------------------------|----------------------------------------------------|-------------------------|------------------|------------------|
|                               |              |                |                             |                                 |                                        |                                |                                     |                                                    | Chronic<br>pancreatitis | Benign<br>tumour | Malign<br>tumour |
| <b>OD cohort (n=243)</b>      |              |                |                             |                                 |                                        |                                |                                     |                                                    |                         |                  |                  |
| <b>ND<br/>204</b><br>(84.0%)  | 108/96       | 61±17          | 25.6±3.8<br>(n=196)         | –                               | 8.5±2.2<br>(n=178)                     | –                              | –                                   | –                                                  | –                       | –                | –                |
| <b>T2D<br/>39</b><br>(16.0%)  | 12/27        | 73±8           | 26.2±3.7<br>(n=39)          | 10.4±6.9<br>(n=32)              | 11.8±3.7<br>(n=37)                     | –                              | –                                   | –                                                  | –                       | –                | –                |
| <b>PPP cohort (n=201)</b>     |              |                |                             |                                 |                                        |                                |                                     |                                                    |                         |                  |                  |
| <b>ND<br/>70</b><br>(34.8%)   | 35/35        | 61±13          | 24.5±4.0                    | –                               | –                                      | 5.3±0.6<br>(n=60)              | 5.5±0.5<br>[37±5.5]<br>(n=69)       | 5.9±1.3<br>(n=53)                                  | 11<br>(16%)             | 22<br>(31%)      | 37<br>(53%)      |
| <b>T2D<br/>54</b><br>(26.9%)  | 20/34        | 65±13*         | 25.6±5.3                    | 10.7±8.9                        | –                                      | 8.2±2.4***<br>(n=47)           | 7.4±1.2***<br>[57±13.1]<br>(n=52)   | –                                                  | 14<br>(26%)             | 6<br>(11%)       | 34<br>(63%)      |
| <b>IGT<br/>30</b><br>(14.9%)  | 13/17        | 63±12          | 26.1±4.1                    | –                               | –                                      | 5.5±0.6<br>(n=30)              | 5.6±0.4<br>[38±4.4]<br>(n=30)       | 9.3±0.8***<br>(n=30)                               | 4<br>(13%)              | 10<br>(33%)      | 16<br>(54%)      |
| <b>T3cD<br/>46</b><br>(22.9%) | 18/28        | 67±10**        | 25.9±4.2                    | 0.05±0.1                        | –                                      | 7.3±4.3**<br>(n=44)            | 6.6±1.4***<br>[49±15.3]<br>(n=46)   | 12.8±2.7***<br>(n=23)                              | 9<br>(19%)              | 5<br>(11%)       | 32<br>(70%)      |
| <b>T1D<br/>1</b><br>(0.5%)    | 0/1          | 53             | 26.9                        | 6.0                             | –                                      | 7.6                            | 7.8                                 | –                                                  | –                       | –                | 1<br>(100%)      |

F, female; M, male; ICU, intensive care unit; IGT, impaired glucose tolerant subject; ND, non-diabetic subject; T1D, type 1 diabetic subject; T2D, type 2 diabetic subject; T3cD, type 3c diabetic subject. Except for sex, the values are means ± standard deviation (two-tailed *t*-test; \**p*<0.05, \*\**p*<0.01 and \*\*\**p*<0.001) versus ND.

**ESM Table 7 Differentially regulated genes in islets from OD and PPP.**

See Excel spreadsheet (provided as a separate file)

Related to Fig. 2 and Table 2. Adj.  $p$ ,  $p$ -value adjusted for multiple hypothesis tests using the Benjamini–Hochberg method; OD, organ donor; PPP, partially pancreatectomized patient; probe ID, probe set ID; reg. OD, regulated in organ donor; reg. PPP, regulated in phenotyped pancreatectomized patient.

**ESM Table 8 Top-20 regulated genes (absolute fold-change of  $\geq 1.5$ ) in islets of T2D OD versus islets of ND OD and in islets of T2D PPP versus islets of ND PPP**

| OD islets            |                                           |                                                                                                    |              |       |                        |                        |
|----------------------|-------------------------------------------|----------------------------------------------------------------------------------------------------|--------------|-------|------------------------|------------------------|
| Entrez ID            | Symbol                                    | Gene name                                                                                          | Probe ID     | Ratio | <i>p</i>               | Adj. <i>p</i>          |
| 10058                | <i>ABCB6</i>                              | ATP-binding cassette, sub-family B (MDR/TAP), member 6                                             | 203192_at    | 0.645 | $3.44 \times 10^{-12}$ | $1.020 \times 10^{-7}$ |
| 57467                | <i>HHATL</i>                              | Hedgehog acyltransferase-like                                                                      | 223572_at    | 0.388 | $1.86 \times 10^{-8}$  | $1.098 \times 10^{-4}$ |
| 6514                 | <i>SLC2A2</i>                             | Solute carrier family 2 (facilitated glucose transporter), member 2                                | 206535_at    | 0.273 | $3.93 \times 10^{-8}$  | $1.657 \times 10^{-4}$ |
| 8544                 | <i>PIR</i>                                | Pirin (iron-binding nuclear protein)                                                               | 207469_s_at  | 0.586 | $1.00 \times 10^{-7}$  | $3.073 \times 10^{-4}$ |
| 5502                 | <i>PPP1R1A</i>                            | Protein phosphatase 1, regulatory (inhibitor) subunit 1A                                           | 235129_at    | 0.419 | $1.25 \times 10^{-7}$  | $3.073 \times 10^{-4}$ |
| 384                  | <i>ARG2</i>                               | Arginase 2                                                                                         | 203946_s_at  | 0.605 | $2.47 \times 10^{-7}$  | $3.286 \times 10^{-4}$ |
| 56605                | <i>ERO1LB</i>                             | ERO1-like beta ( <i>S. cerevisiae</i> )                                                            | 220012_at    | 0.554 | $3.08 \times 10^{-7}$  | $3.627 \times 10^{-4}$ |
| 64130                | <i>LIN7B</i>                              | Lin-7 homolog B ( <i>C. elegans</i> )                                                              | 219760_at    | 0.589 | $4.08 \times 10^{-7}$  | $4.155 \times 10^{-4}$ |
| 7057                 | <i>THBS1</i>                              | Thrombospondin 1                                                                                   | 201110_s_at  | 1.761 | $4.59 \times 10^{-7}$  | $4.515 \times 10^{-4}$ |
| 3375                 | <i>IAPP</i>                               | Islet amyloid polypeptide                                                                          | 207062_at    | 0.580 | $6.12 \times 10^{-7}$  | $5.312 \times 10^{-4}$ |
| 79623                | <i>GALNT14</i>                            | UDP-N-acetyl-alpha-D-galactosamine:polypeptide N-acetylgalactosaminyltransferase 14 (GalNAc-T14)   | 219271_at    | 0.493 | $1.08 \times 10^{-6}$  | $7.407 \times 10^{-4}$ |
| 773 ///<br>100507353 | <i>CACNA1A</i> ///<br><i>LOC100507353</i> | Calcium channel, voltage-dependent, P/Q type, alpha 1A subunit<br>/// uncharacterized LOC100507353 | 1558945_s_at | 0.469 | $1.39 \times 10^{-6}$  | $7.641 \times 10^{-4}$ |
| 486 ///<br>100533181 | <i>FXYD2</i> ///<br><i>FXYD6-FXYD2</i>    | FXYD domain containing ion transport regulator 2 /// FXYD6-FXYD2 readthrough                       | 207434_s_at  | 0.594 | $1.54 \times 10^{-6}$  | $7.641 \times 10^{-4}$ |
| 2740                 | <i>GLPIR</i>                              | Glucagon-like peptide 1 receptor                                                                   | 208400_at    | 0.526 | $1.38 \times 10^{-6}$  | $7.641 \times 10^{-4}$ |
| 89765                | <i>RSPH1</i>                              | Radial spoke head 1 homolog ( <i>Chlamydomonas</i> )                                               | 230093_at    | 0.654 | $1.55 \times 10^{-6}$  | $7.641 \times 10^{-4}$ |
| 4093                 | <i>SMAD9</i>                              | SMAD family member 9                                                                               | 227719_at    | 0.554 | $1.58 \times 10^{-6}$  | $7.641 \times 10^{-4}$ |
| 84623                | <i>KIRREL3</i>                            | Kin of IRRE like 3 ( <i>Drosophila</i> )                                                           | 240402_at    | 0.445 | $2.14 \times 10^{-6}$  | $8.332 \times 10^{-4}$ |
| 3428                 | <i>IFI16</i>                              | Interferon, gamma-inducible protein 16                                                             | 208965_s_at  | 1.525 | $2.26 \times 10^{-6}$  | $8.663 \times 10^{-4}$ |
| 5798                 | <i>PTPRN</i>                              | Protein tyrosine phosphatase, receptor type, N                                                     | 204945_at    | 0.548 | $2.73 \times 10^{-6}$  | $9.673 \times 10^{-4}$ |
| 309                  | <i>ANXA6</i>                              | Annexin A6                                                                                         | 200982_s_at  | 0.654 | $3.02 \times 10^{-6}$  | $1.002 \times 10^{-3}$ |

| PPP islets |                 |                                                                                |              |       |                        |                        |
|------------|-----------------|--------------------------------------------------------------------------------|--------------|-------|------------------------|------------------------|
| Entrez ID  | Symbol          | Gene name                                                                      | Probe ID     | Ratio | <i>p</i>               | Adj <i>p</i>           |
| 26577      | <i>PCOLCE2</i>  | Procollagen C-endopeptidase enhancer 2                                         | 219295_s_at  | 6.519 | $1.23 \times 10^{-15}$ | $3.65 \times 10^{-11}$ |
| 392617     | <i>ELFN1</i>    | Extracellular leucine-rich repeat and fibronectin type III domain containing 1 | 229581_at    | 4.391 | $7.10 \times 10^{-15}$ | $1.05 \times 10^{-10}$ |
| 229        | <i>ALDOB</i>    | Aldolase B, fructose-bisphosphate                                              | 204705_x_at  | 4.588 | $1.85 \times 10^{-13}$ | $1.24 \times 10^{-9}$  |
| 384        | <i>ARG2</i>     | Arginase 2                                                                     | 203946_s_at  | 0.463 | $2.98 \times 10^{-13}$ | $1.47 \times 10^{-9}$  |
| 140738     | <i>TMEM37</i>   | Transmembrane protein 37                                                       | 227190_at    | 0.504 | $9.09 \times 10^{-13}$ | $3.84 \times 10^{-9}$  |
| 430        | <i>ASCL2</i>    | Achaete-scute complex homolog 2 (Drosophila)                                   | 229215_at    | 0.463 | $5.97 \times 10^{-12}$ | $1.74 \times 10^{-8}$  |
| 145270     | <i>PRIMA1</i>   | Proline rich membrane anchor 1                                                 | 230087_at    | 4.975 | $7.65 \times 10^{-12}$ | $1.74 \times 10^{-8}$  |
| 6514       | <i>SLC2A2</i>   | Solute carrier family 2 (facilitated glucose transporter), member 2            | 206535_at    | 0.362 | $7.52 \times 10^{-12}$ | $1.74 \times 10^{-8}$  |
| 27122      | <i>DKK3</i>     | Dickkopf WNT signaling pathway inhibitor 3                                     | 221127_s_at  | 2.335 | $1.35 \times 10^{-11}$ | $2.86 \times 10^{-8}$  |
| 23017      | <i>FAIM2</i>    | Fas apoptotic inhibitory molecule 2                                            | 203619_s_at  | 3.826 | $1.47 \times 10^{-11}$ | $2.91 \times 10^{-8}$  |
| 151647     | <i>FAM19A4</i>  | Family with sequence similarity 19 (chemokine (C-C motif)-like), member A4     | 242348_at    | 0.379 | $1.47 \times 10^{-10}$ | $2.41 \times 10^{-7}$  |
| 5172       | <i>SLC26A4</i>  | Solute carrier family 26, member 4                                             | 206529_x_at  | 3.379 | $2.11 \times 10^{-10}$ | $3.29 \times 10^{-7}$  |
| 57393      | <i>TMEM27</i>   | Transmembrane protein 27                                                       | 223784_at    | 0.572 | $4.25 \times 10^{-10}$ | $6.29 \times 10^{-7}$  |
| 2906       | <i>GRIN2D</i>   | Glutamate receptor, ionotropic, N-methyl D-aspartate 2D                        | 229883_at    | 0.423 | $1.03 \times 10^{-9}$  | $1.32 \times 10^{-6}$  |
| 203111     | <i>C8orf47</i>  | Chromosome 8 open reading frame 47                                             | 1552389_at   | 0.554 | $3.61 \times 10^{-9}$  | $3.58 \times 10^{-6}$  |
| 5502       | <i>PPP1R1A</i>  | Protein phosphatase 1, regulatory (inhibitor) subunit 1A                       | 235129_at    | 0.475 | $5.80 \times 10^{-9}$  | $5.54 \times 10^{-6}$  |
| 192668     | <i>CYS1</i>     | Cystin 1                                                                       | 228739_at    | 0.395 | $6.92 \times 10^{-9}$  | $6.29 \times 10^{-6}$  |
| 170691     | <i>ADAMTS17</i> | ADAM metalloproteinase with thrombospondin type 1 motif, 17                    | 1552727_s_at | 3.053 | $1.68 \times 10^{-8}$  | $1.42 \times 10^{-5}$  |
| 10752      | <i>CHL1</i>     | Cell adhesion molecule with homology to L1CAM (close homolog of L1)            | 204591_at    | 0.446 | $1.95 \times 10^{-8}$  | $1.56 \times 10^{-5}$  |
| 83876      | <i>MRO</i>      | Maestro                                                                        | 231358_at    | 0.432 | $2.08 \times 10^{-8}$  | $1.62 \times 10^{-5}$  |

Related to Fig. 2 and Table 2. Adj. *p*, *p*-value adjusted for multiple hypothesis tests using the Benjamini–Hochberg method; ND, non-diabetic subject; OD, organ donor; PPP, phenotyped pancreatectomized patient; probe ID, probe set ID; T2D, type 2 diabetic subject.

**ESM Table 9 RNAseq differential expression of the 19 signature genes identified by microarrays**

| <b>Gene symbol</b>         | <b>DESeq2 log2FC</b> | <b>DESeq2 adj. <i>p</i></b> | <b>Limma log2FC</b> | <b>Limma adj. <i>p</i></b> |
|----------------------------|----------------------|-----------------------------|---------------------|----------------------------|
| <i>ARG2</i>                | 0.8662               | 2.32×10 <sup>-6</sup>       | 0.8906              | 0.115909107                |
| <i>PPP1R1A</i>             | 0.7243               | 9.03×10 <sup>-6</sup>       | 0.7042              | 0.094173095                |
| <i>CHL1</i>                | -0.8072              | 0.019487108                 | -0.8088             | 0.250944235                |
| <i>FBXO32</i>              | -0.5505              | 0.026054668                 | -0.5641             | 0.222276879                |
| <i>SLC2A2</i>              | 0.5459               | 0.035281768                 | 0.5444              | 0.329481919                |
| <i>NSG1</i>                | -0.4456              | 0.43006851                  | -0.5198             | 0.454843133                |
| <i>FAM102B</i>             | -0.5884              | 0.58224798                  | -0.5316             | 0.599328157                |
| <i>UNC5D</i>               | 0.4089               | 0.771939204                 | 0.1052              | 0.980593289                |
| <i>G6PC2</i>               | 0.1976               | 0.80802655                  | 0.2163              | 0.697640805                |
| <i>ANKRD39<sup>l</sup></i> | 0.2133               | 0.863044479                 | 0.1699              | 0.802122995                |
| <i>TMEM37</i>              | -0.1522              | 0.953608152                 | -0.1865             | 0.715048321                |
| <i>CD44</i>                | -0.1088              | 0.973151446                 | -0.1373             | 0.757562348                |
| <i>HHATL</i>               | 0.2231               | 0.986919081                 | 0.2694              | 0.859040284                |
| <i>SCTR</i>                | 0.1865               | 0.986919081                 | 0.1870              | 0.879517345                |
| <i>CAPN13</i>              | -0.0428              | 0.999689273                 | 0.0013              | 0.999544913                |
| <i>FFAR4</i>               | 0.0945               | 0.999689273                 | 0.1962              | 0.946451699                |
| <i>ANKRD23<sup>l</sup></i> | -0.0542              | 1                           | 0.0696              | 0.9846822                  |
| <i>ASCL2</i>               | 0.7319               | 1                           | 0.4520              | 0.929239565                |
| <i>KCNH8</i>               | -0.2335              | 1                           | 0.0023              | 0.999544913                |
| <i>PCDH20</i>              | 0.1503               | 1                           | -0.5325             | 0.334922553                |

DE, differential expression; log2FC, log2 fold change; adj. *p*, adjusted *p*-value.

<sup>l</sup>*ANKRD39* and *ANKRD23* were not distinguishable by microarray.

**ESM Table 10 Top-2 $\beta$  regulated GOs for T2D vs. ND regulated probesets.**

| <b>Top-20 GOs for T2D vs ND downregulated probe sets in OD islets</b>  |                                         |                         |              |             |
|------------------------------------------------------------------------|-----------------------------------------|-------------------------|--------------|-------------|
| <b>GOBPID</b>                                                          | <b>Term</b>                             | <b>P-value</b>          | <b>Count</b> | <b>Size</b> |
| GO:0007267                                                             | Cell-cell signaling                     | $4.091 \times 10^{-25}$ | 69           | 771         |
| GO:0023061                                                             | Signal release                          | $6.532 \times 10^{-24}$ | 44           | 308         |
| GO:0030072                                                             | Peptide hormone secretion               | $4.371 \times 10^{-19}$ | 31           | 185         |
| GO:0046879                                                             | Hormone secretion                       | $7.427 \times 10^{-19}$ | 33           | 218         |
| GO:0009914                                                             | Hormone transport                       | $1.143 \times 10^{-18}$ | 33           | 221         |
| GO:0002790                                                             | Peptide secretion                       | $1.147 \times 10^{-18}$ | 31           | 191         |
| GO:0051046                                                             | Regulation of secretion                 | $4.334 \times 10^{-18}$ | 44           | 430         |
| GO:0010817                                                             | Regulation of hormone levels            | $5.722 \times 10^{-18}$ | 38           | 318         |
| GO:1903530                                                             | Regulation of secretion by cell         | $8.089 \times 10^{-18}$ | 42           | 397         |
| GO:0030073                                                             | Insulin secretion                       | $1.504 \times 10^{-17}$ | 28           | 164         |
| GO:0007268                                                             | Synaptic transmission                   | $2.265 \times 10^{-17}$ | 44           | 449         |
| GO:0015833                                                             | Peptide transport                       | $3.849 \times 10^{-17}$ | 32           | 231         |
| GO:0046883                                                             | Regulation of hormone secretion         | $1.626 \times 10^{-16}$ | 28           | 179         |
| GO:0042886                                                             | Amide transport                         | $1.742 \times 10^{-16}$ | 32           | 243         |
| GO:0090276                                                             | Regulation of peptide hormone secretion | $1.844 \times 10^{-16}$ | 26           | 151         |
| GO:0002791                                                             | Regulation of peptide secretion         | $3.588 \times 10^{-16}$ | 26           | 155         |
| GO:0050796                                                             | Regulation of insulin secretion         | $2.644 \times 10^{-15}$ | 24           | 139         |
| GO:0097479                                                             | Synaptic vesicle localization           | $5.884 \times 10^{-15}$ | 21           | 104         |
| GO:0032940                                                             | Secretion by cell                       | $7.003 \times 10^{-15}$ | 49           | 642         |
| GO:0071705                                                             | Nitrogen compound transport             | $1.701 \times 10^{-14}$ | 44           | 537         |
| <b>Top-20 GOs for T2D vs ND downregulated probe sets in PPP islets</b> |                                         |                         |              |             |
| <b>GOBPID</b>                                                          | <b>Term</b>                             | <b>P-value</b>          | <b>Count</b> | <b>Size</b> |
| GO:0043583                                                             | Ear development                         | $1.498 \times 10^{-5}$  | 6            | 139         |
| GO:0010817                                                             | Regulation of hormone levels            | $2.255 \times 10^{-5}$  | 8            | 311         |
| GO:0046879                                                             | Hormone secretion                       | $1.669 \times 10^{-4}$  | 6            | 214         |
| GO:0009914                                                             | Hormone transport                       | $1.800 \times 10^{-4}$  | 6            | 217         |
| GO:0048729                                                             | Tissue morphogenesis                    | $1.897 \times 10^{-4}$  | 8            | 421         |
| GO:0050796                                                             | Regulation of insulin secretion         | $2.362 \times 10^{-4}$  | 5            | 145         |
| GO:0035295                                                             | Tube development                        | $3.170 \times 10^{-4}$  | 8            | 454         |
| GO:0090276                                                             | Regulation of peptide hormone secretion | $3.217 \times 10^{-4}$  | 5            | 155         |
| GO:0002009                                                             | Morphogenesis of an epithelium          | $3.259 \times 10^{-4}$  | 7            | 343         |
| GO:0009790                                                             | Embryo development                      | $3.325 \times 10^{-4}$  | 10           | 714         |
| GO:0002791                                                             | Regulation of peptide secretion         | $3.619 \times 10^{-4}$  | 5            | 159         |
| GO:0050708                                                             | Regulation of protein secretion         | $4.291 \times 10^{-4}$  | 6            | 255         |
| GO:0009887                                                             | Organ morphogenesis                     | $4.650 \times 10^{-4}$  | 9            | 608         |
| GO:0030073                                                             | Insulin secretion                       | $4.788 \times 10^{-4}$  | 5            | 169         |
| GO:0046883                                                             | Regulation of hormone secretion         | $5.614 \times 10^{-4}$  | 5            | 175         |
| GO:0044707                                                             | Single-multicellular organism process   | $5.759 \times 10^{-4}$  | 27           | 4085        |
| GO:0010721                                                             | Negative regulation of cell development | $7.050 \times 10^{-4}$  | 5            | 184         |
| GO:0048562                                                             | Embryonic organ morphogenesis           | $7.403 \times 10^{-4}$  | 5            | 186         |
| GO:0090087                                                             | Regulation of peptide transport         | $7.403 \times 10^{-4}$  | 5            | 186         |
| GO:0030072                                                             | Peptide hormone secretion               | $7.585 \times 10^{-4}$  | 5            | 187         |

Related to Fig. 4. OD, organ donor; PPP, phenotyped pancreatectomized patient; T2D, type 2 diabetic subject.

**ESM Table 11 Downregulated genes assigned to the insulin secretion Gene Ontology (GO: 0030073) for islets from T2D OD and T2D PPP**

| <b>T2D vs ND downregulated genes in OD islets assigned to ‘insulin secretion’ GO</b>  |                 |              |                        |
|---------------------------------------------------------------------------------------|-----------------|--------------|------------------------|
| <b>Probe ID</b>                                                                       | <b>Symbol</b>   | <b>Ratio</b> | <b>Adj. p</b>          |
| 210246_s at                                                                           | <i>ABCC8</i>    | 0.509        | $1.223 \times 10^{-3}$ |
| 1552519 at                                                                            | <i>ACVR1C</i>   | 0.649        | $4.461 \times 10^{-2}$ |
| 209869 at                                                                             | <i>ADRA2A</i>   | 0.646        | $2.229 \times 10^{-2}$ |
| 1558944 at                                                                            | <i>CACNA1A</i>  | 0.528        | $1.037 \times 10^{-3}$ |
| 1558945_s at                                                                          | <i>CACNA1A</i>  | 0.469        | $7.641 \times 10^{-4}$ |
| 204811_s at                                                                           | <i>CACNA2D2</i> | 0.626        | $3.070 \times 10^{-3}$ |
| 223500 at                                                                             | <i>CPLX1</i>    | 0.635        | $1.003 \times 10^{-2}$ |
| 205630 at                                                                             | <i>CRH</i>      | 0.463        | $8.142 \times 10^{-3}$ |
| 1561507 at                                                                            | <i>FFAR1</i>    | 0.579        | $7.271 \times 10^{-3}$ |
| 221453 at                                                                             | <i>G6PC2</i>    | 0.616        | $3.440 \times 10^{-2}$ |
| 231291 at                                                                             | <i>GIPR</i>     | 0.664        | $1.557 \times 10^{-2}$ |
| 208400 at                                                                             | <i>GLP1R</i>    | 0.526        | $7.641 \times 10^{-4}$ |
| 208401_s at                                                                           | <i>GLP1R</i>    | 0.602        | $1.002 \times 10^{-3}$ |
| 217057_s at                                                                           | <i>GNAS</i>     | 0.528        | $7.948 \times 10^{-3}$ |
| 229380 at                                                                             | <i>ILDR2</i>    | 0.573        | $2.654 \times 10^{-3}$ |
| 206762 at                                                                             | <i>KCNA5</i>    | 0.655        | $3.043 \times 10^{-2}$ |
| 216096_s at                                                                           | <i>NRXN1</i>    | 0.632        | $7.760 \times 10^{-3}$ |
| 205825 at                                                                             | <i>PCSK1</i>    | 0.644        | $7.105 \times 10^{-3}$ |
| 1554789_a at                                                                          | <i>PDE8B</i>    | 0.566        | $6.236 \times 10^{-3}$ |
| 204945 at                                                                             | <i>PTPRN</i>    | 0.548        | $9.673 \times 10^{-4}$ |
| 219140_s at                                                                           | <i>RBP4</i>     | 0.577        | $5.728 \times 10^{-3}$ |
| 222049_s at                                                                           | <i>RBP4</i>     | 0.564        | $6.530 \times 10^{-3}$ |
| 1552673 at                                                                            | <i>RFX6</i>     | 0.620        | $8.586 \times 10^{-3}$ |
| 229823 at                                                                             | <i>RIMS2</i>    | 0.657        | $1.458 \times 10^{-2}$ |
| 206535 at                                                                             | <i>SLC2A2</i>   | 0.273        | $1.657 \times 10^{-4}$ |
| 1552985 at                                                                            | <i>SLC30A8</i>  | 0.654        | $3.325 \times 10^{-2}$ |
| 202508_s at                                                                           | <i>SNAP25</i>   | 0.634        | $1.026 \times 10^{-2}$ |
| 204729_s at                                                                           | <i>STX1A</i>    | 0.549        | $2.029 \times 10^{-3}$ |
| 202260_s at                                                                           | <i>STXBP1</i>   | 0.658        | $1.559 \times 10^{-3}$ |
| 240236 at                                                                             | <i>STXBP5L</i>  | 0.583        | $5.083 \times 10^{-3}$ |
| 232025 at                                                                             | <i>SYT7</i>     | 0.629        | $2.233 \times 10^{-3}$ |
| <b>T2D vs ND downregulated genes in PPP islets assigned to ‘insulin secretion’ GO</b> |                 |              |                        |
| <b>Probe ID</b>                                                                       | <b>Symbol</b>   | <b>Ratio</b> | <b>Adj. p</b>          |
| 221453 at                                                                             | <i>G6PC2</i>    | 0.643        | $2.773 \times 10^{-2}$ |
| 210938 at                                                                             | <i>PDX1</i>     | 0.631        | $6.419 \times 10^{-5}$ |
| 209992 at                                                                             | <i>PFKFB2</i>   | 0.644        | $2.833 \times 10^{-2}$ |
| 206535 at                                                                             | <i>SLC2A2</i>   | 0.362        | $1.743 \times 10^{-8}$ |
| 223784 at                                                                             | <i>TMEM27</i>   | 0.572        | $6.288 \times 10^{-7}$ |



Related to Fig. 4. OD, organ donor; Adj.  $p$ ,  $p$ -value adjusted for multiple hypothesis tests using the Benjamini–Hochberg method; PPP, phenotyped pancreatectomized patient; T2D, type 2 diabetic subject.

**ESM Table 12 Downstream functions predicted to be significantly increased or decreased among the differentially regulated probe sets in islets from T2D OD and T2D PPP**

| <b>Ingenuity downstream functions for T2D vs ND regulated probe sets in OD islets</b> |                                   |                           |                        |                    |
|---------------------------------------------------------------------------------------|-----------------------------------|---------------------------|------------------------|--------------------|
| <b>Diseases or functions annotation</b>                                               | <b>Predicted activation state</b> | <b>Activation z-score</b> | <b><i>p</i></b>        | <b>Gene number</b> |
| Coordination                                                                          | Decreased                         | -3.225                    | $2.03 \times 10^{-5}$  | 18                 |
| Size of body                                                                          | Decreased                         | -3.220                    | $3.35 \times 10^{-6}$  | 52                 |
| Transport of metal ion                                                                | Decreased                         | -2.822                    | $2.98 \times 10^{-7}$  | 26                 |
| Long-term potentiation                                                                | Decreased                         | -2.796                    | $5.30 \times 10^{-4}$  | 17                 |
| Transport of metal                                                                    | Decreased                         | -2.703                    | $5.86 \times 10^{-9}$  | 30                 |
| Transport of monovalent inorganic cation                                              | Decreased                         | -2.646                    | $1.79 \times 10^{-4}$  | 16                 |
| Conditioning                                                                          | Decreased                         | -2.407                    | $1.51 \times 10^{-5}$  | 18                 |
| Concentration of cyclic AMP                                                           | Decreased                         | -2.380                    | $1.09 \times 10^{-6}$  | 19                 |
| Release of neurotransmitter                                                           | Decreased                         | -2.325                    | $2.80 \times 10^{-12}$ | 24                 |
| Transport of cation                                                                   | Decreased                         | -2.313                    | $1.53 \times 10^{-5}$  | 27                 |
| Neoplasia of epithelial tissue                                                        | Decreased                         | -2.296                    | $2.91 \times 10^{-4}$  | 329                |
| Rearing                                                                               | Decreased                         | -2.282                    | $4.09 \times 10^{-5}$  | 11                 |
| Growth of neurites                                                                    | Decreased                         | -2.211                    | $7.15 \times 10^{-7}$  | 35                 |
| Outgrowth of neurites                                                                 | Decreased                         | -2.207                    | $1.89 \times 10^{-6}$  | 31                 |
| Quantity of vesicles                                                                  | Decreased                         | -2.170                    | $5.37 \times 10^{-4}$  | 9                  |
| Accumulation of cyclic AMP                                                            | Decreased                         | -2.115                    | $2.16 \times 10^{-4}$  | 13                 |
| Differentiation of tumour cell lines                                                  | Decreased                         | -2.105                    | $1.61 \times 10^{-3}$  | 22                 |
| Outgrowth of cells                                                                    | Decreased                         | -2.078                    | $3.20 \times 10^{-6}$  | 32                 |
| Heart septal defect                                                                   | Decreased                         | -2.033                    | $1.88 \times 10^{-3}$  | 9                  |
| Synaptic transmission                                                                 | Decreased                         | -2.018                    | $1.83 \times 10^{-8}$  | 31                 |
| Neonatal death                                                                        | Increased                         | 2.121                     | $4.50 \times 10^{-7}$  | 34                 |
| Hyperesthesia                                                                         | Increased                         | 2.157                     | $1.66 \times 10^{-3}$  | 9                  |
| Ataxia                                                                                | Increased                         | 2.161                     | $1.03 \times 10^{-3}$  | 17                 |
| Organismal death                                                                      | Increased                         | 2.246                     | $1.30 \times 10^{-6}$  | 116                |
| Seizure disorder                                                                      | Increased                         | 2.361                     | $2.63 \times 10^{-9}$  | 40                 |
| Seizures                                                                              | Increased                         | 2.361                     | $1.53 \times 10^{-8}$  | 35                 |
| Movement disorders                                                                    | Increased                         | 2.545                     | $2.32 \times 10^{-7}$  | 65                 |
| Proliferation of tumour cell lines                                                    | Increased                         | 2.760                     | $3.50 \times 10^{-4}$  | 69                 |
| Hyperactive behaviour                                                                 | Increased                         | 2.920                     | $3.82 \times 10^{-6}$  | 15                 |

| <b>Ingenuity downstream functions for T2D vs ND regulated probe sets in PPP islets</b> |                                   |                           |                       |                    |
|----------------------------------------------------------------------------------------|-----------------------------------|---------------------------|-----------------------|--------------------|
| <b>Diseases or functions annotation</b>                                                | <b>Predicted activation state</b> | <b>Activation z-score</b> | <b><i>p</i></b>       | <b>Gene number</b> |
| Quantity of beta islet cells                                                           | Decreased                         | -2.805                    | $1.43 \times 10^{-4}$ | 8                  |
| Quantity of secretory structure                                                        | Decreased                         | -2.503                    | $2.27 \times 10^{-2}$ | 12                 |
| Cell survival                                                                          | Decreased                         | -2.460                    | $1.07 \times 10^{-2}$ | 84                 |
| Quantity of islet cells                                                                | Decreased                         | -2.447                    | $1.06 \times 10^{-3}$ | 9                  |
| Quantity of apud cells                                                                 | Decreased                         | -2.442                    | $1.63 \times 10^{-4}$ | 9                  |
| Clathrin mediated endocytosis                                                          | Decreased                         | -2.407                    | $2.11 \times 10^{-2}$ | 6                  |
| Cell viability                                                                         | Decreased                         | -2.340                    | $1.66 \times 10^{-2}$ | 77                 |
| Quantity of neuroendocrine cells                                                       | Decreased                         | -2.299                    | $8.50 \times 10^{-4}$ | 11                 |
| Size of brain                                                                          | Decreased                         | -2.164                    | $2.57 \times 10^{-2}$ | 12                 |
| Quantity of protein in blood                                                           | Decreased                         | -2.076                    | $4.95 \times 10^{-4}$ | 40                 |
| Phagocytosis of phagocytes                                                             | Increased                         | 2.011                     | $1.15 \times 10^{-2}$ | 11                 |
| Phagocytosis of myeloid cells                                                          | Increased                         | 2.154                     | $4.86 \times 10^{-3}$ | 12                 |
| Phagocytosis of neutrophils                                                            | Increased                         | 2.190                     | $6.38 \times 10^{-3}$ | 6                  |
| Quantity of carbohydrate                                                               | Increased                         | 2.342                     | $7.61 \times 10^{-3}$ | 36                 |
| Seizure disorder                                                                       | Increased                         | 2.433                     | $2.69 \times 10^{-3}$ | 35                 |
| Organismal death                                                                       | Increased                         | 2.453                     | $1.45 \times 10^{-3}$ | 146                |

Related to Fig. 2 and Fig. 4. OD, organ donor; PPP, phenotyped pancreatectomized patient; T2D, type 2 diabetic subject.

**ESM Table 13 Upstream regulators predicted to be significantly activated or inhibited among the differentially regulated probe sets in islets from OD and PPP**

| <b>Ingenuity upstream regulators of T2D vs ND regulated probe sets in OD islets</b>  |                  |                                   |                                   |                           |                        |
|--------------------------------------------------------------------------------------|------------------|-----------------------------------|-----------------------------------|---------------------------|------------------------|
| <b>Upstream regulator</b>                                                            | <b>Log ratio</b> | <b>Molecule type</b>              | <b>Predicted activation state</b> | <b>Activation z-score</b> | <b>P-value</b>         |
| <i>TNF</i>                                                                           | 0.515            | Cytokine                          | Activated                         | 4.078                     | $1.49 \times 10^{-5}$  |
| <i>REST</i>                                                                          | 0.559            | Transcription regulator           | Activated                         | 3.395                     | $2.92 \times 10^{-18}$ |
| <i>IL1B</i>                                                                          | 0.817            | Cytokine                          | Activated                         | 3.031                     | $7.95 \times 10^{-8}$  |
| <i>STAT1</i>                                                                         | 0.086            | Transcription regulator           | Activated                         | 2.630                     | $2.24 \times 10^{-2}$  |
| <i>IL1A</i>                                                                          | 0.486            | Cytokine                          | Activated                         | 2.595                     | $5.67 \times 10^{-3}$  |
| <i>IFI16</i>                                                                         | 0.613            | Transcription regulator           | Activated                         | 2.412                     | $5.81 \times 10^{-3}$  |
| <i>AR</i>                                                                            | -0.215           | Ligand-dependent nuclear receptor | Activated                         | 2.377                     | $2.33 \times 10^{-2}$  |
| <i>FOXO1</i>                                                                         | 0.111            | Transcription regulator           | Activated                         | 2.270                     | $6.61 \times 10^{-3}$  |
| <i>TLR3</i>                                                                          | 0.446            | Transmembrane receptor            | Activated                         | 2.206                     | $4.90 \times 10^{-2}$  |
| <i>PRKCD</i>                                                                         | -0.096           | Kinase                            | Activated                         | 2.166                     | $3.78 \times 10^{-2}$  |
| <i>MAP3K8</i>                                                                        | 0.292            | Kinase                            | Activated                         | 2.159                     | $1.12 \times 10^{-2}$  |
| <i>IKBKB</i>                                                                         | 0.079            | Kinase                            | Activated                         | 2.126                     | $8.36 \times 10^{-4}$  |
| <i>CTNNB1</i>                                                                        | 0.106            | Transcription regulator           | Activated                         | 2.064                     | $6.04 \times 10^{-4}$  |
| <i>NTRK2</i>                                                                         | -0.136           | Kinase                            | Inhibited                         | -2.000                    | $3.60 \times 10^{-2}$  |
| <i>TAB1</i>                                                                          | -0.089           | Enzyme                            | Inhibited                         | -2.000                    | $3.24 \times 10^{-3}$  |
| <i>PAX6</i>                                                                          | -0.596           | Transcription regulator           | Inhibited                         | -2.070                    | $2.30 \times 10^{-4}$  |
| <i>BDNF</i>                                                                          | 0.027            | Growth factor                     | Inhibited                         | -2.166                    | $2.37 \times 10^{-7}$  |
| <i>NEUROD1</i>                                                                       | -0.545           | Transcription regulator           | Inhibited                         | -2.619                    | $1.10 \times 10^{-5}$  |
| <i>ADCYAP1</i>                                                                       | -0.811           | Other                             | Inhibited                         | -2.720                    | $1.34 \times 10^{-2}$  |
| <b>Ingenuity upstream regulators of T2D vs ND regulated probe sets in PPP islets</b> |                  |                                   |                                   |                           |                        |
| <b>Upstream regulator</b>                                                            | <b>Log ratio</b> | <b>Molecule type</b>              | <b>Predicted activation state</b> | <b>Activation z-score</b> | <b>P-value</b>         |
| <i>RICTOR</i>                                                                        | 0.130            | Other                             | Activated                         | 2.848                     | $1.40 \times 10^{-2}$  |
| <i>SRC</i>                                                                           | -0.052           | Kinase                            | Inhibited                         | -2.156                    | $2.13 \times 10^{-3}$  |
| <i>HNF1A</i>                                                                         | -0.328           | Transcription regulator           | Inhibited                         | -2.573                    | $8.81 \times 10^{-4}$  |

Related to Fig. 2 and Fig. 5. OD, organ donor; PPP, phenotyped pancreatectomized patient.

**ESM Table 14 Islet signature genes with predicted binding sites for HNF1A and PDX1. Number of predicted binding sites in the promoters is indicated.**

| <b>Gene</b>         | <b>ENTREZ ID</b> | <b>HNF1A</b> | <b>PDX1</b> |
|---------------------|------------------|--------------|-------------|
| <i>ANKRD23/39</i>   | 51239/200539     |              | 1           |
| <i>ARG2</i>         | 384              |              | 5           |
| <i>ASCL2</i>        | 430              |              |             |
| <i>CAPN13</i>       | 92291            |              | 13          |
| <i>CHL1</i>         | 10752            |              | 39          |
| <i>FFAR4</i>        | 338557           |              |             |
| <i>G6PC2</i>        | E57818           |              | 15          |
| <i>HHATL</i>        | 57467            |              | 1           |
| <i>NSG1/D4S234E</i> | 27065            |              |             |
| <i>PCDH20</i>       | 64881            |              | 2           |
| <i>PPP1R1A</i>      | 5502             |              | 3           |
| <i>SCTR</i>         | 6344             |              | 1           |
| <i>SLC2A2</i>       | 6514             |              | 5           |
| <i>TMEM37</i>       | 140738           |              |             |
| <i>UNC5D</i>        | 137970           | 1            | 33          |
| <i>CD44</i>         | 960              | 2            | 19          |
| <i>FAM102B</i>      | 284611           | 1            | 2           |
| <i>FBXO32</i>       | 114907           |              | 19          |
| <i>KCNH8</i>        | 131096           |              | 15          |

**ESM Table 15 Bailey Comparison**

See Excel spreadsheet (provided as a separate file).

Related to Fig. 2 and Table 2. Differential expression analysis results for ADEX, Immunogenic, Progenitor and Squamous pancreatic cancer subtypes were downloaded from Bailey et al. [7].

The comparisons of each of the four subtypes against the other three subtypes were used to define a specific gene expression signature for each subtype, which were then compared to the differential expression results from PPP and OD samples (T2D vs ND). Only genes with a fold-change  $\geq 1.5$  and adjusted  $p$ -value  $\leq 0.05$  were considered to be differentially expressed for each comparison. The number of upregulated or downregulated genes, as well as the total number of DE genes in OD and PPP T2D vs ND that overlap with each signature is shown. Significance of overlap between PPP or OD T2D vs ND comparisons and each of the pancreatic cancer subtype signatures was calculated using the hypergeometric distribution with the background as the total number of expressed genes in the OD or PPP samples. The genes overlapping between OD/PPP and the tumour signatures are also shown.

**ESM Table 16 Islet characteristics**

|              | Mean no of LCM islets/patient | Mean LCM islet volume [ $\mu\text{m}^3$ ]/patient | Islet RNA/patient (ng) [range] | RIN           |
|--------------|-------------------------------|---------------------------------------------------|--------------------------------|---------------|
| ND<br>32     | 42 $\pm$ 15                   | 29,673,810 $\pm$ 11,210,130                       | 4.9–207.8                      | 6.6 $\pm$ 0.7 |
| T2D<br>36    | 47 $\pm$ 14                   | 32,597,030 $\pm$ 11,405,690                       | 5.9–784.0                      | 6.0 $\pm$ 0.8 |
| IGT<br>15    | 39 $\pm$ 13                   | 25,991,280 $\pm$ 6,031,880                        | 4.8–335.0                      | 6.3 $\pm$ 0.7 |
| T3cD<br>20   | 45 $\pm$ 11                   | 28,103,890 $\pm$ 6,420,620                        | 7.5–163.3                      | 6.4 $\pm$ 0.7 |
| Total<br>103 | 44 $\pm$ 14                   | 29,854,390 $\pm$ 10,048,130                       | 4.8–784.0                      | 6.3 $\pm$ 0.8 |

LCM, laser capture microdissection; RIN, RNA Integrity Number; ND, non-diabetic subjects; T2D, type 2 diabetes; IGT, impaired glucose tolerance; T3cD, type 3c diabetes.

**ESM Table 17 Clinical and functional traits used for the module correlations**

| <b>Trait</b>                                                                          | <b>Sample type</b> |
|---------------------------------------------------------------------------------------|--------------------|
| Sex (M/F)                                                                             | OD+PPP             |
| Age (years)                                                                           | OD+PPP             |
| Height (cm)                                                                           | OD+PPP             |
| Weight (kg)                                                                           | OD+PPP             |
| BMI (kg/m <sup>2</sup> )                                                              | OD+PPP             |
| Diabetes status (T2D, T3D, IGT, ND)                                                   | OD+PPP             |
| Blood glucose in ICU (mmol/l)                                                         | OD                 |
| Fructosamine (μmol/l)                                                                 | OD                 |
| Glucose-induced ISI                                                                   | OD                 |
| Glibenclamide-induced ISI                                                             | OD                 |
| Arginine-stimulated insulin secretion index                                           | OD                 |
| Basal insulin secretion at 3.3 mmol/l glucose (pg/islet/min)                          | OD                 |
| Glucose-stimulated insulin secretion at 16.7 mmol/l glucose (pg/islet/min)            | OD                 |
| Glibenclamide-stimulated insulin secretion at 100 mmol/l glibenclamide (pg/islet/min) | OD                 |
| Arginine-stimulated insulin secretion at 100 mm arginine (pg/islet/min)               | OD                 |
| Oral glucose tolerance (AUC)                                                          | PPP                |
| Blood glucose i.vi OGTT at 0 h (mmol/l)                                               | PPP                |
| Blood glucose i.v. OGTT at 1 h (mmol/l)                                               | PPP                |
| Blood glucose i.v. OGTT at 2 h (mmol/l)                                               | PPP                |
| HbA <sub>1c</sub> (%) [mmol/mol]                                                      | PPP                |
| HOMA1 IR Index                                                                        | PPP                |
| HOMA1 B Index                                                                         | PPP                |
| HOMA1 S Index                                                                         | PPP                |
| Fasting insulin i.p. (pmol/l)                                                         | PPP                |
| Fasting glucose i.p. (mmol/l)                                                         | PPP                |
| Fasting insulin i.p. (nmol/l)                                                         | PPP                |
| Insulin IS 1 h (nmol/l)                                                               | PPP                |
| Insulin IS 2 h (nmol/l)                                                               | PPP                |
| Fasting C-peptide IS (nmol/l)                                                         | PPP                |
| C-peptide IS 1 h (nmol/l)                                                             | PPP                |
| C-peptide IS 2 h (nmol/l)                                                             | PPP                |
| Fasting pro-insulin IS (pmol/l)                                                       | PPP                |
| Pro-insulin IS 1 h (pmol/l)                                                           | PPP                |
| Pro-insulin IS 2 h (pmol/l)                                                           | PPP                |
| K IS (mmol/l)                                                                         | PPP                |
| Mg IS (mmol/l)                                                                        | PPP                |
| C-peptide IS 1 h/fasting C peptide (ratio)                                            | PPP                |
| Insulin IS 1 h/fasting insulin IS (ratio)                                             | PPP                |



|                                                   |     |
|---------------------------------------------------|-----|
| Pro-insulin IS 1 h/fasting pro-insulin IS (ratio) | PPP |
|---------------------------------------------------|-----|

M, male; F, female; OD, organ donor; PPP, phenotyped pancreatectomised patient; T2D, type 2 diabetes; T3cD, type 3c diabetes; IGT, impaired glucose tolerance; ND, non-diabetic subjects; ICU, intensive care unit; OGTT, oral glucose tolerance test; ISI, insulin stimulation index; IS, in serum; AUC, area under the concentration–time curve.

**ESM Table 18 Significance of selected OD and PPP modules**

| <b>Module</b> | <b>Type</b> | <b>Z-score</b> | <b><i>p</i></b> |
|---------------|-------------|----------------|-----------------|
| Blue          | OD          | 80.54          | <0.001          |
| Skyblue       | OD          | 73.89          | <0.001          |
| Darkviolet    | OD          | 47.22          | <0.001          |
| Plum1         | OD          | 35.99          | <0.001          |
| Antiquewhite4 | PPP         | 80.11          | <0.001          |
| Firebrick     | PPP         | 86.72          | <0.001          |
| Deeppink2     | PPP         | 68.73          | <0.001          |
| Lightpink4    | PPP         | 76.46          | <0.001          |
| Coral3        | PPP         | 23.91          | <0.001          |

OD, organ donor; PPP, phenotyped pancreatectomised patient.

**ESM Table 19 Modules and correlated traits used for the sequenced-based TF network generation**

| <b>Module</b> | <b>Sample source</b> | <b>Correlated trait</b>         |
|---------------|----------------------|---------------------------------|
| Antiquewhite4 | PPP                  | Fasting insulin                 |
| Blue          | OD                   | Insulin stimulation index       |
| Darkviolet    | OD                   | Insulin stimulation index       |
| Deeppink2     | PPP                  | Mg                              |
| Lightpink4    | PPP                  | Blood glucose at 2 h            |
| Plum1         | OD                   | Glibenclamide stimulation index |
| Skyblue       | OD                   | Glucose stimulation index       |

OD, organ donor; PPP, phenotyped pancreatectomised patient; Mg, Magnesium.

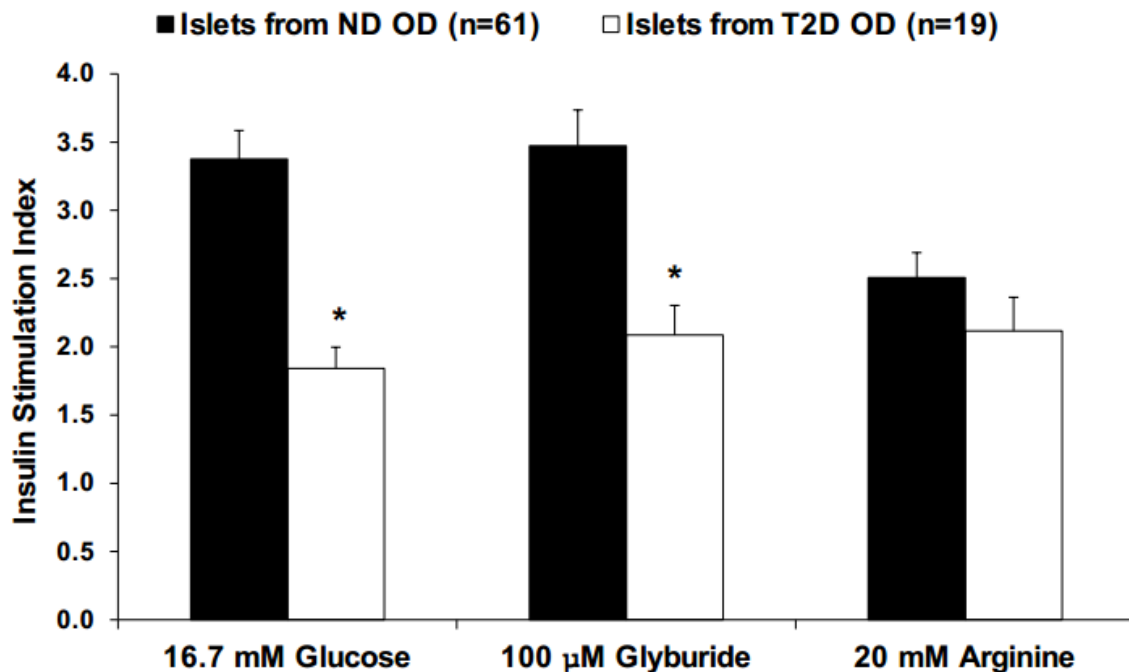

**ESM Fig. 1 T2D OD islets secrete less insulin in response to glucose or glyburide.** Related to Table 1. Hand-picked islets of ND and T2D OD were exposed to 3.3 mmol/l glucose for 45 min to assess basal insulin release (pmol/10 islets/h, mean±SE) and then challenged with 16.7 mmol/l glucose, 3.3 mmol/l glucose plus 100 μmol/l glyburide, or 3.3 mmol/l glucose plus 20 mmol/l arginine. Basal insulin release was 0.133±0.008 and 0.129±0.004 for T2D and ND OD islets, respectively ( $p=0.77$ , two-tailed Student's  $t$ -test). Insulin secretion in response to 16.7 mmol/l glucose ( $0.258±0.037$  vs  $0.491±0.050$ ,  $p=0.01$ ) and glyburide ( $0.283±0.033$  vs  $0.457±0.037$ ,  $p=0.01$ ), but not to arginine ( $0.283±0.033$  vs  $0.312±0.025$ ,  $p=0.47$ ), was lower in T2D islets. Accordingly, the insulin stimulation index (stimulated over basal insulin release, ISI) was lower in T2D islets after stimulation with glucose or glyburide ( $*p<0.01$ , two-tailed Student's  $t$ -test). ND, non-diabetic; T2D, type 2 diabetes

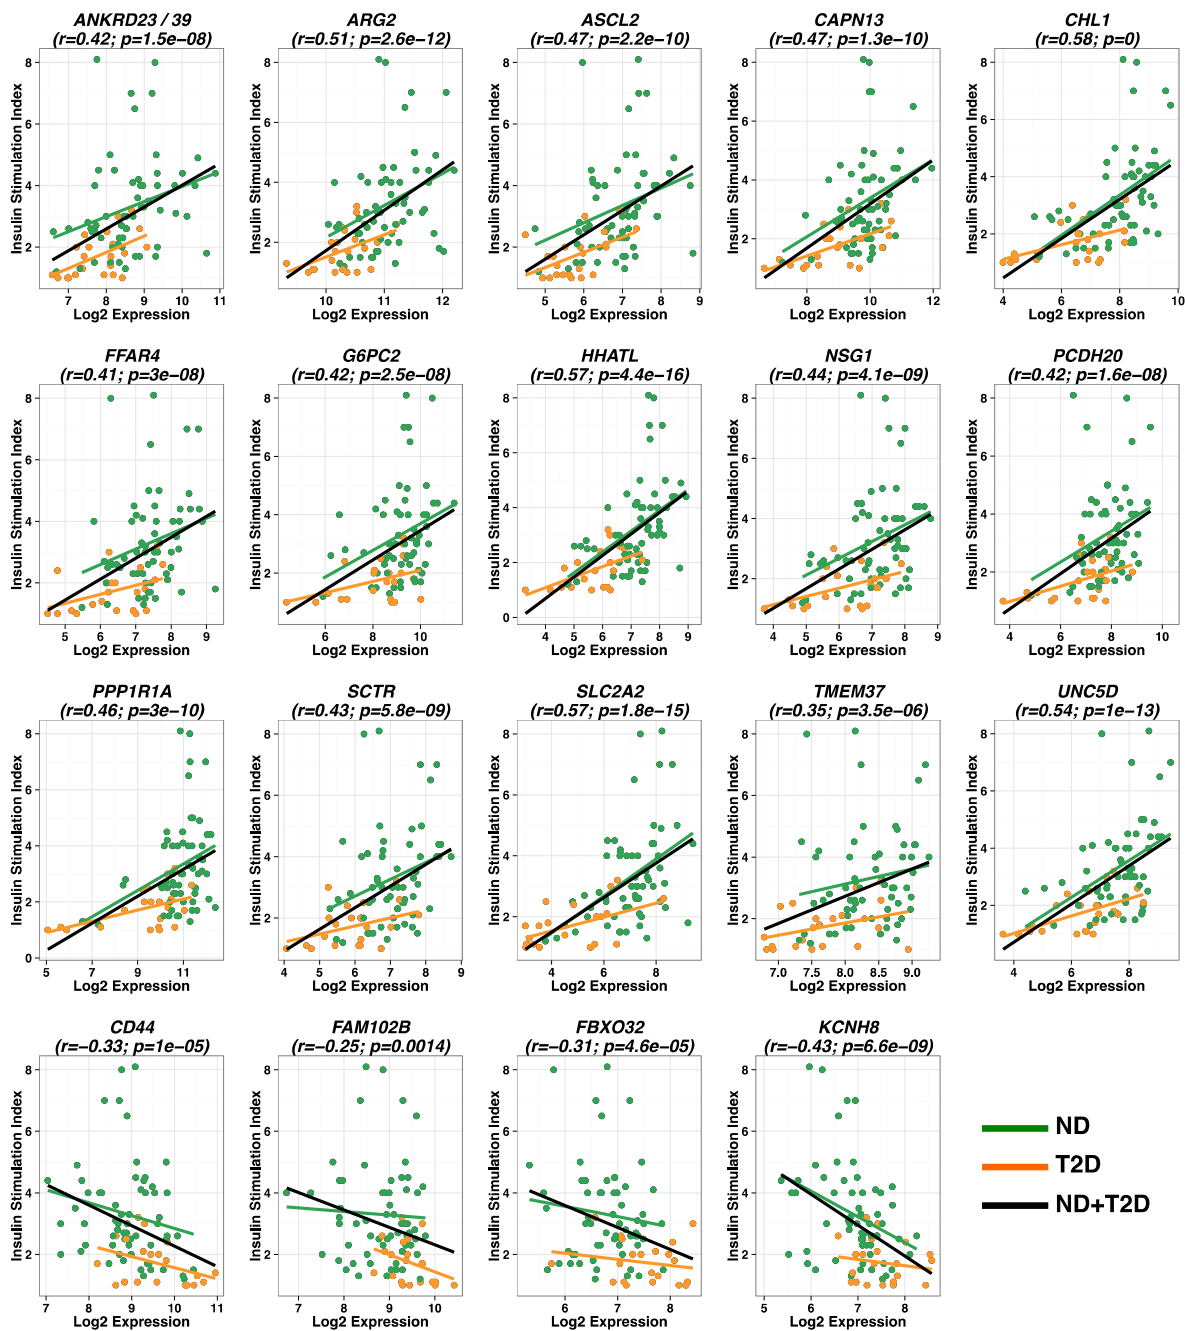

regression line for the ND and T2D samples combined is coloured black. Pearson's correlation coefficients ( $r$ ) and the corresponding  $p$ -values are indicated at the top of each plot. ND, non-diabetic; T2D, type 2 diabetes

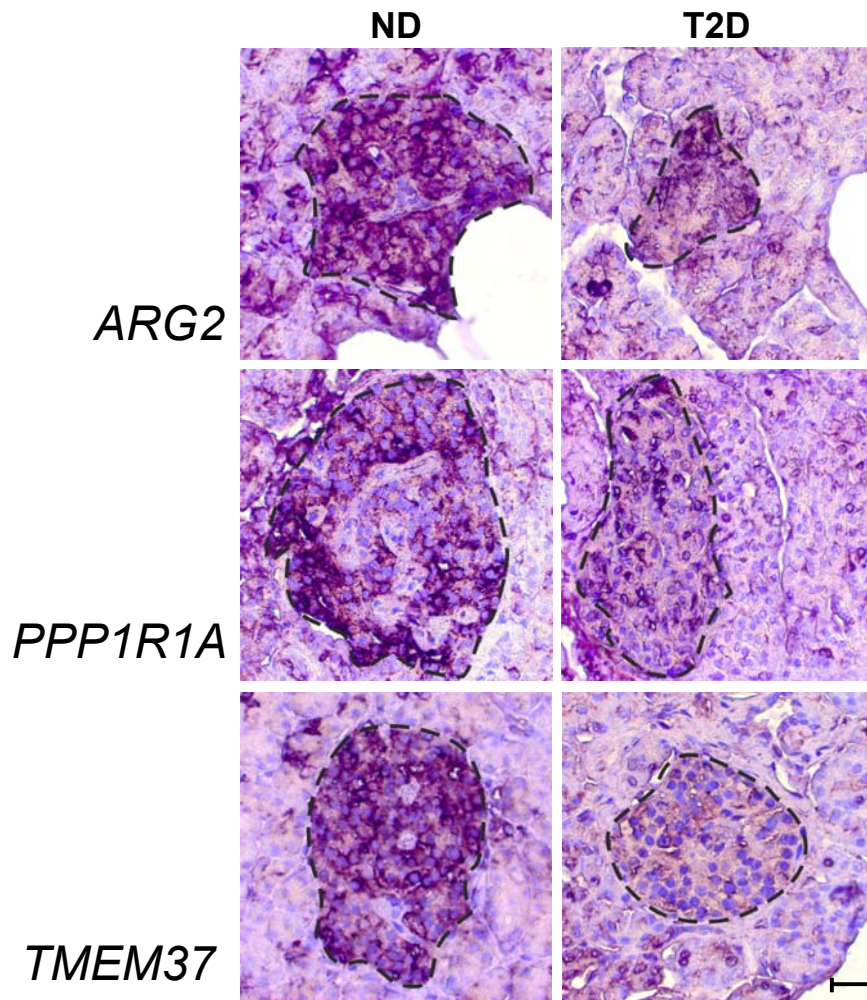

**ESM Fig. 3** *In situ* RT-PCR for *ARG2*, *PPP1R1A*, and *TMEM37* expression in ND pancreatic sections. Related to Fig. 3 and Table 2, which report RT-PCR results for the these three transcripts and the full list of differentially expressed genes, respectively. The dashed black lines indicate the margins of the islets. The images are representative of 80 islets analysed in each group. ND, non-diabetic; T2D, type 2 diabetes. Scale bar for all panels: 25 $\mu$ m

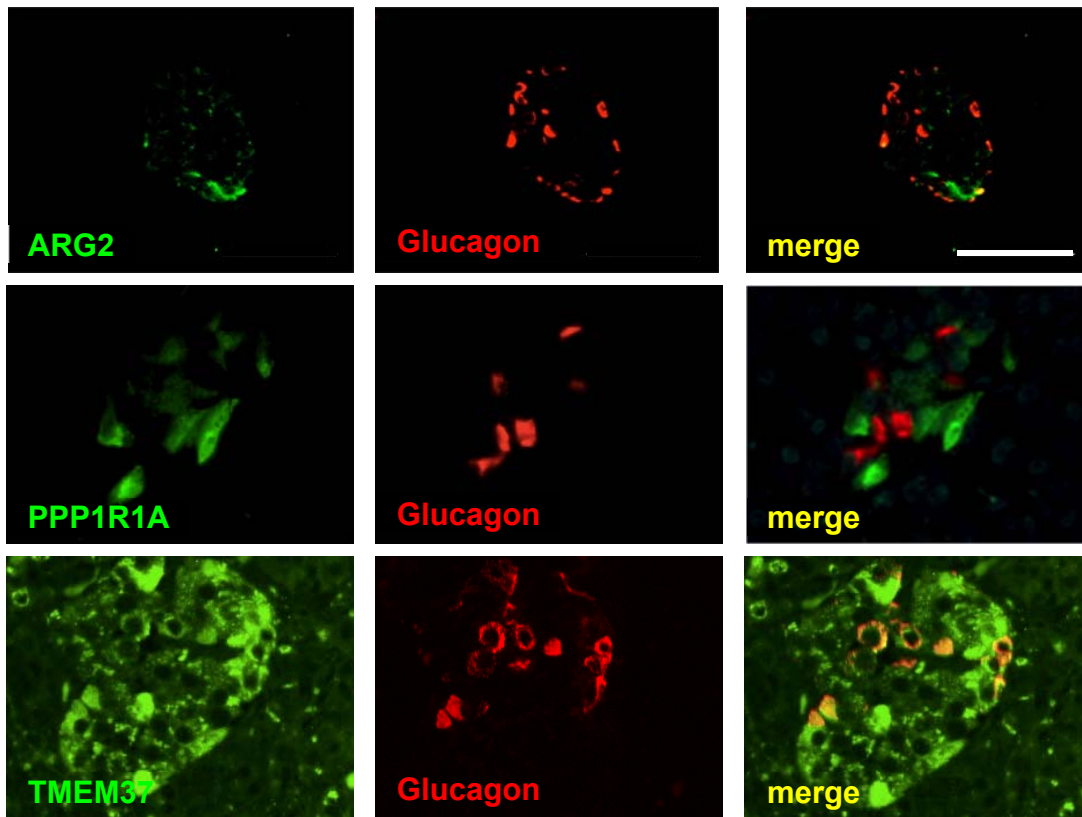

**ESM Fig. 4 Confocal microscopy of human pancreas sections for ARG2, PPP1R1A and TMEM37 in addition to glucagon.** Related to Fig. 3 and Table 2. The immunostaining was performed on pancreatic tissue that were fixed in paraformaldehyde and embedded in paraffin. Scale bar for all panels: 100 $\mu$ m

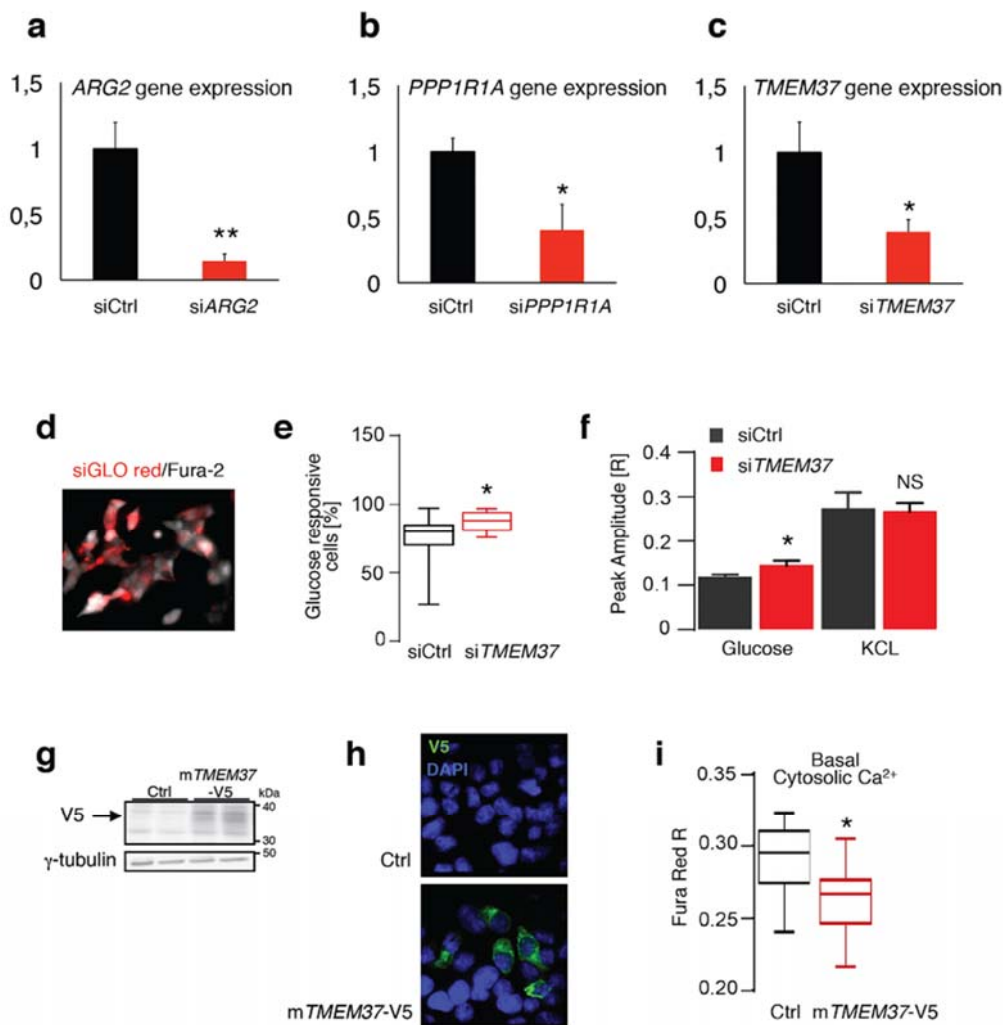

**ESM Fig. 5 Functional validation of ARG2, PPP1R1A and TMEM37 in insulin-producing cells.** Related to Fig. 3. (a–c). Silencing of *ARG2* (a), *PPP1R1A* (b) and *TMEM37* (c) in INS-1 832/13 cells was confirmed by RT-qPCR. Expression levels were normalized to those of *beta-actin* mRNA. (d). Image of INS-1 832/13 cells transfected with siGLO<sup>+</sup> (red) and loaded with Fura-2 AM (grey). (e). Boxplot showing the median (line), 25th and 75th percentiles (box), and minimum–maximum (whiskers) percentage of si*TMEM37*- or siCtrl-treated INS-1 832/13 cells with changes in cytosolic  $Ca^{2+}$  concentrations in response to glucose. (f). Peak  $Ca^{2+}$  amplitudes in si*TMEM37*- or siCtrl-treated INS-1 832/13 cells in response to high glucose or high KCl (NS,  $p > 0.05$ , \* $p < 0.05$ , \*\* $p < 0.01$ , Mann–Whitney  $U$  test). (g). Immunoblots for V5 and gamma-tubulin in *TMEM37*-V5-transfected and control INS-1 832/13 cells. (h). Immunostaining for V5 (green) in *TMEM37*-V5-transfected and control INS-1 832/13 cells. Nuclei were counterstained with DAPI (blue). (i). Boxplot showing the median (line), 25th and 75th percentiles (box), and minimum–maximum (whiskers) basal cytosolic  $Ca^{2+}$  concentrations in 332 siCtrl-treated ( $n=10$



coverslips) and 419 *siTMEM37*-treated (n=12 coverslips) INS-1 832/13 cells (\* $p < 0.05$ , unpaired two-tailed  $t$ -test).

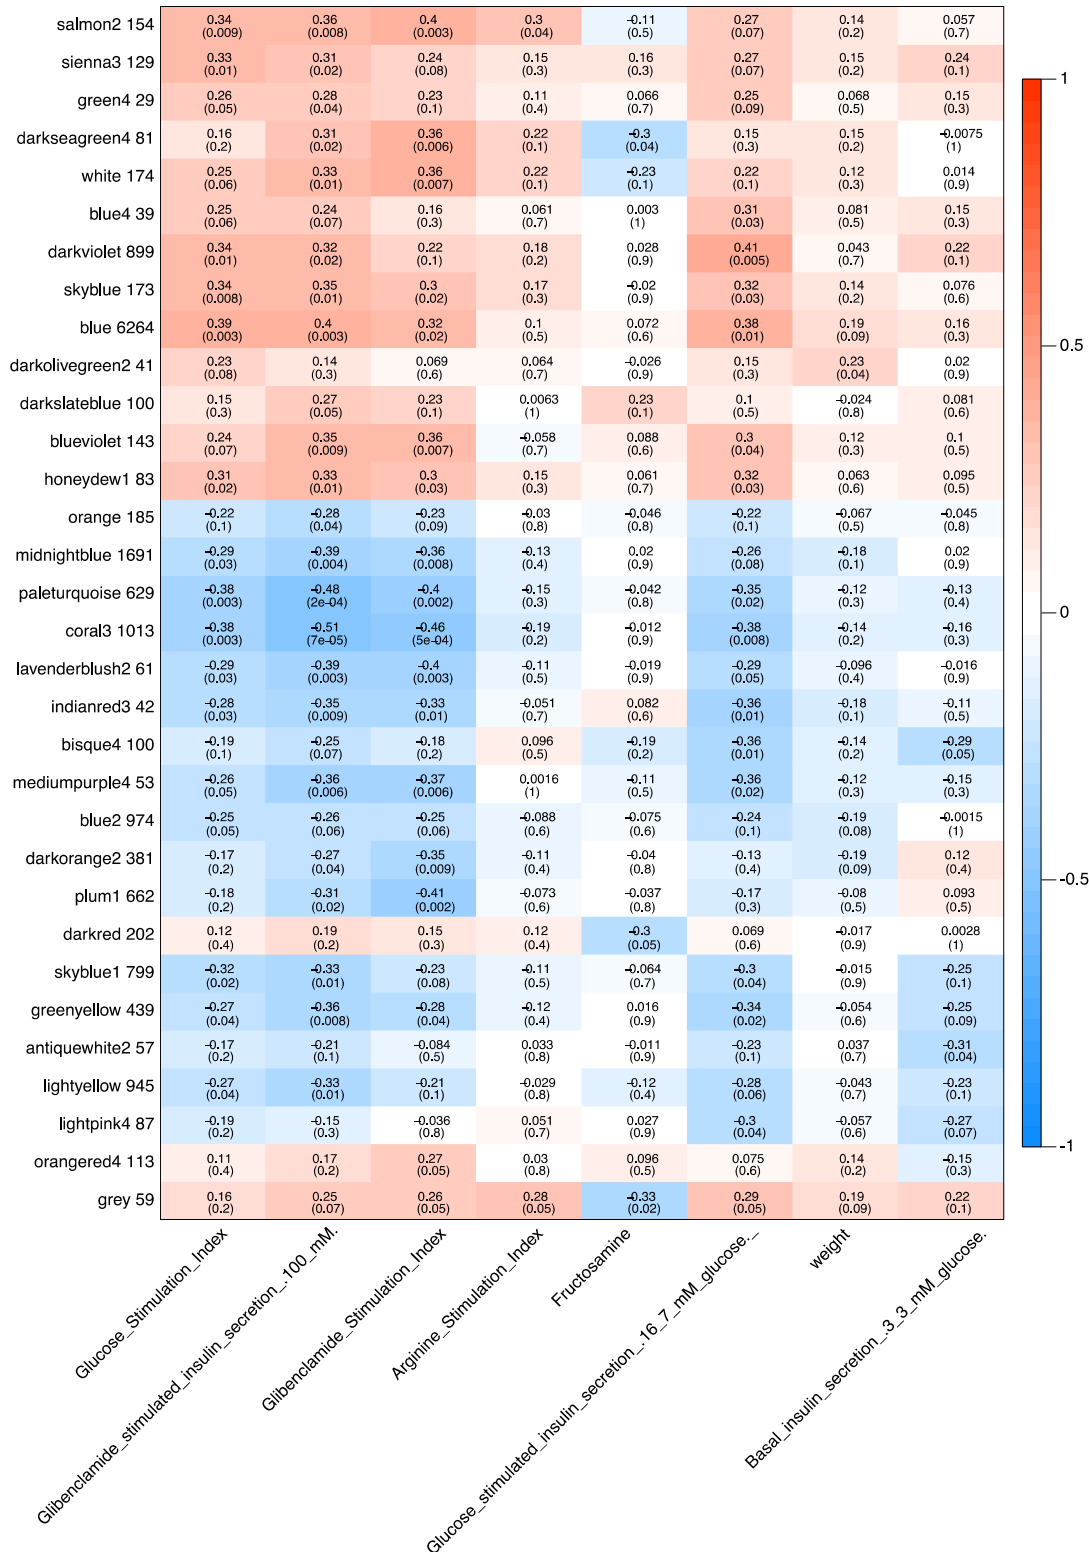

**ESM Fig. 6 OD-islet co-expression module correlations with clinical and functional traits.** Only module-trait correlations with  $p \leq 0.05$  are shown. The colours indicate the strength of the

correlation (blue=strong negative correlation; red=strong positive correlation). Glucose/glibenclamide/arginine stimulation index refers to the glucose/glibenclamide/arginine-induced insulin stimulation index.

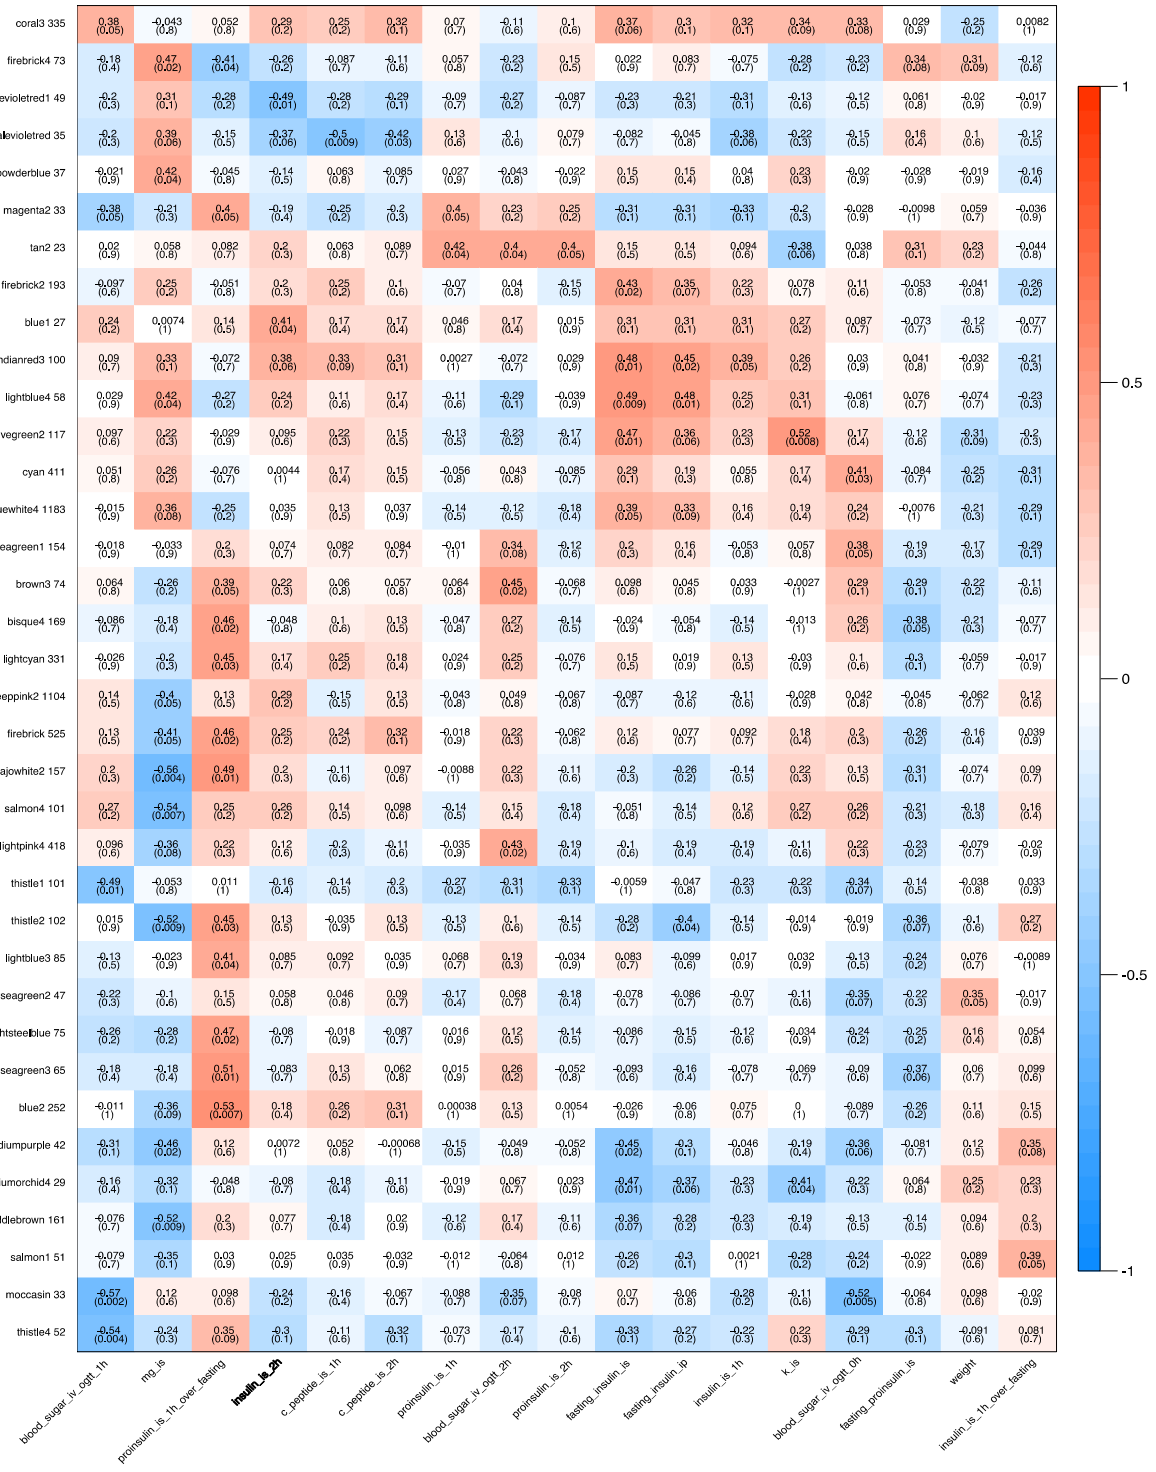

**ESM Fig. 7 PPP-islet co-expression module correlations with clinical and functional traits.** Only module-trait correlations with  $p \leq 0.05$  are shown. The colours indicate the strength of the correlation (blue=strong negative correlation; red=strong positive correlation).

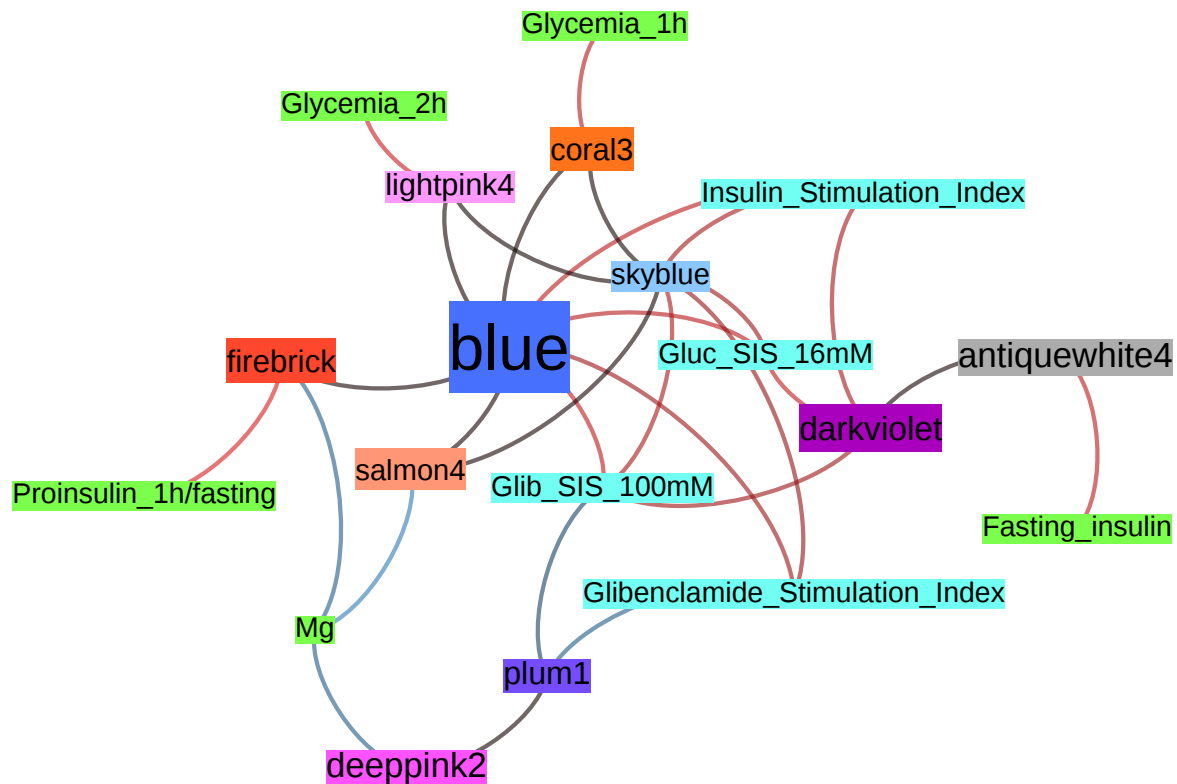

**ESM Fig. 8 Module-trait heatmap showing OD and PPP module correlations with functional and clinical traits.** The modules (blue, skyblue, darkviolet, antiquewhite4, coral3, lightpink4, firebrick, salmon4, plum1 and deeppink2) are coloured according to their names. OD traits Glucose-induced insulin stimulation index (insulin\_stimulation\_index), Glucose-induced insulin secretion at 16mM (Gluc\_ISI\_16mM), Glibenclamide stimulation index and Glibenclamide-induced insulin secretion at 100mM (Glib\_ISI\_100mM) are coloured in turquoise and are connected to OD modules (blue, skyblue, darkviolet, plum1). PPP traits Glycemia (OGTT) at 1 or 2 hours (Glycemia\_1h/2h), fasting insulin, proinsulin at 1 hour/fasting proinsulin and magnesium (Mg) are coloured in light green and are connected to PPP modules (firebrick, salmon4, lightpink4, coral3, deeppink2, antiquewhite4). Red edges indicate positive correlations between modules and traits; blue edges represent negative correlations between modules and traits. Dark grey edges between modules represent significant overlap between module genes.

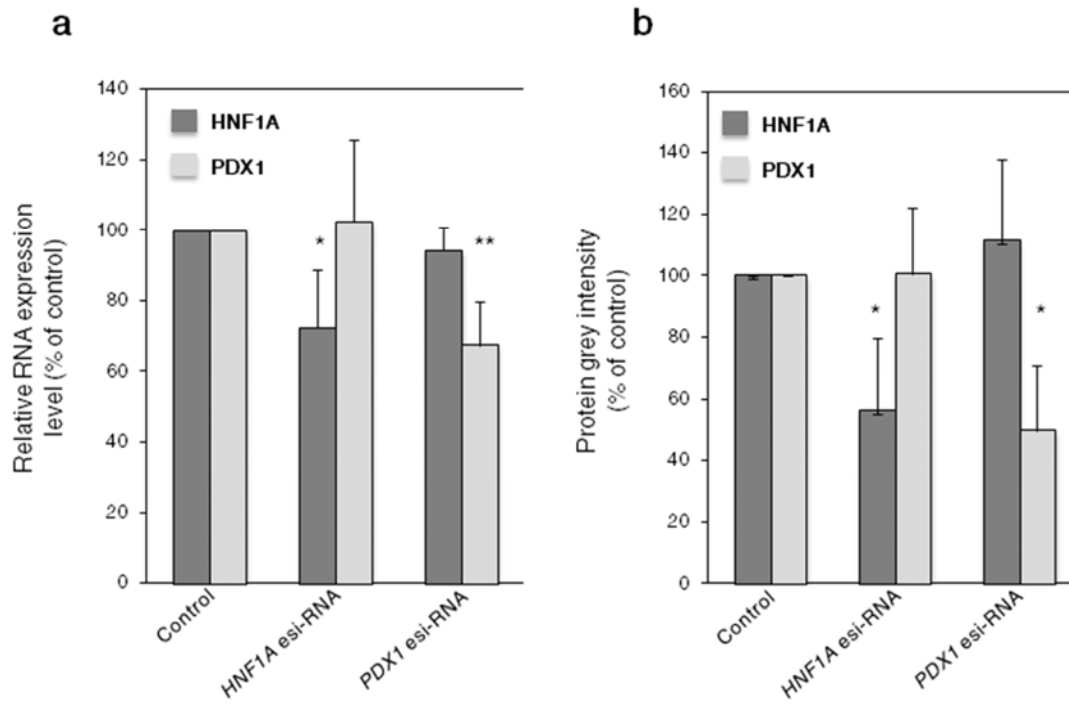

**ESM Fig. 9** Efficiency of *PDX1* and *HNF1A* esiRNA-induced silencing in EndoC-βH1 cells. Related to Fig. 6. (a). RT-qPCR. (b). Immunoblotting (Student's *t*-test, \* $p < 0.05$ , \*\* $p < 0.01$ ).

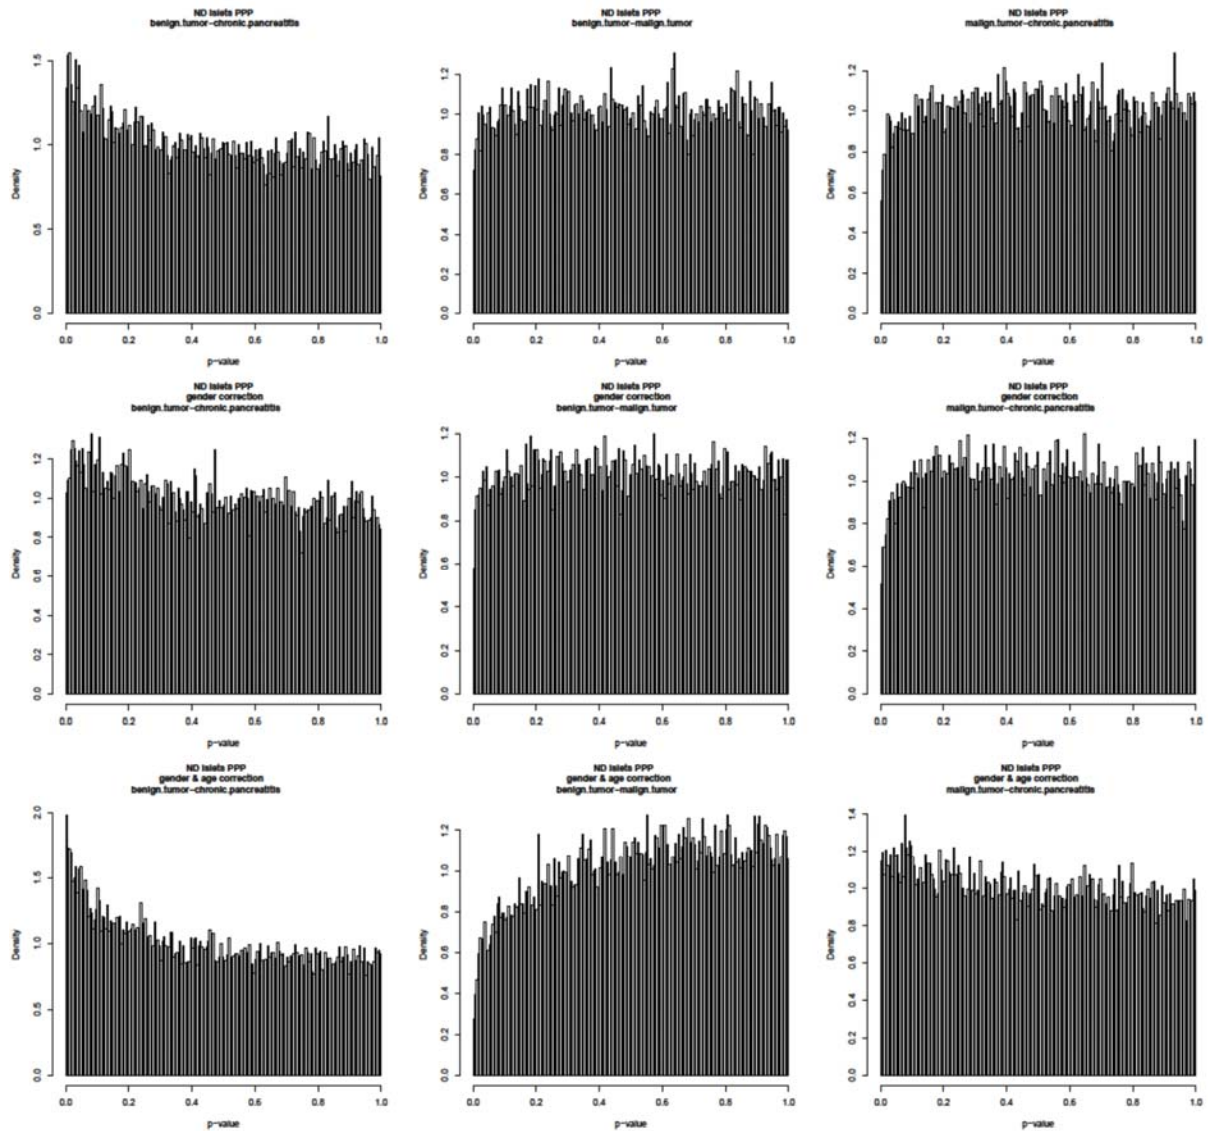

**ESM Fig. 10 Linear regression for pancreatic disease in islets from ND PPP.** Related to Fig. 2 and Table 1. Islets were obtained by LCM. Linear regression was performed without and with adjustment for age and sex. Most  $p$ -value distributions follow a nearly uniform distribution, showing only a mild enrichment of low  $p$ -values. Linear regression for benign tumour versus chronic pancreatitis, with adjustment for age and sex, shows the highest enrichment of low  $p$ -values (60 probe sets with  $p \leq 0.001$  and 0 probe sets with an FDR of  $\leq 0.05$ ). ND, non-diabetic.

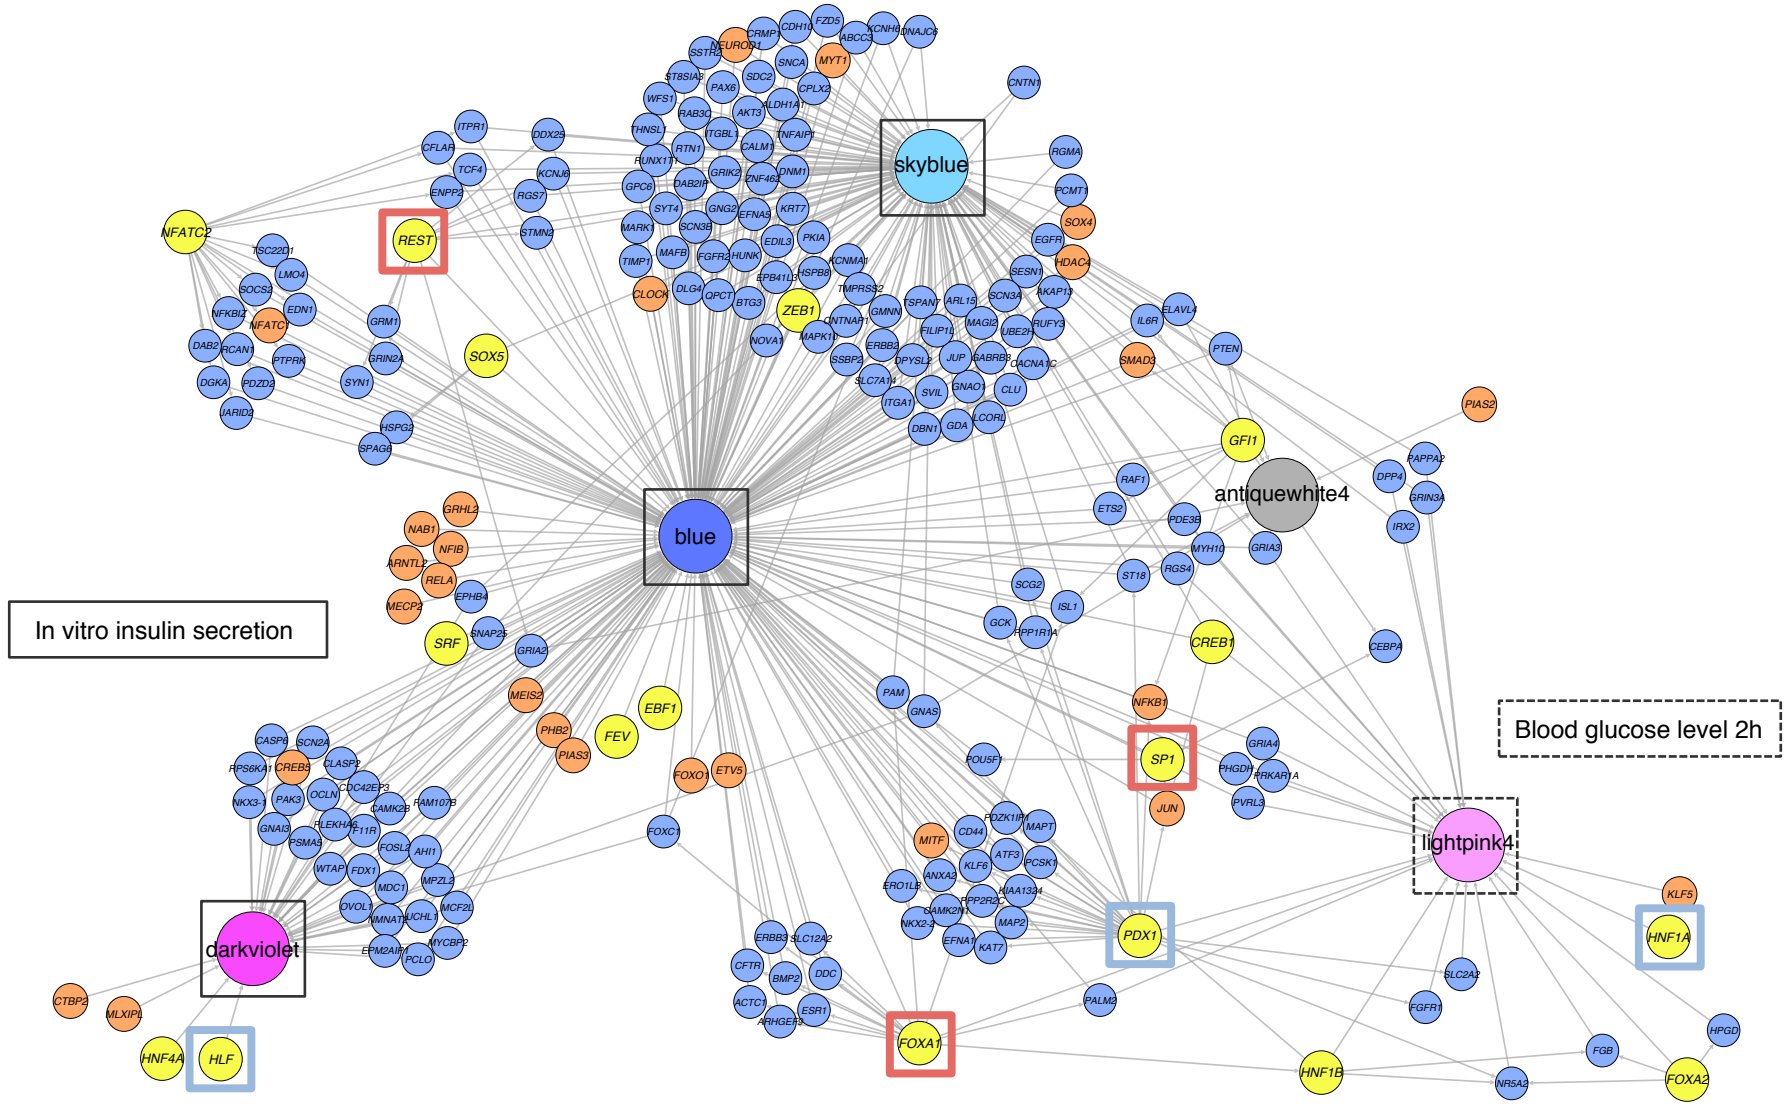

ESM Fig. 11. Detailed view of Fig. 5.



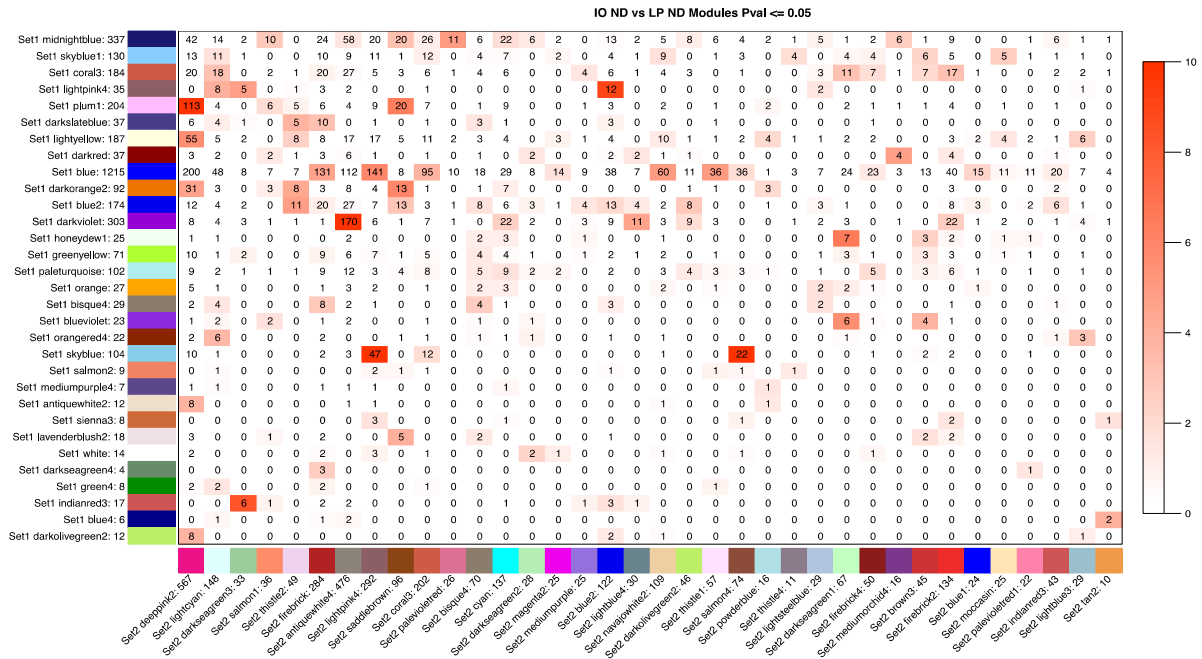

ESM Fig. 12 Comparison of OD-islet modules (Set1) and PPP-islet modules (Set2). Numbers indicate number of overlapping genes. The intensity of red indicates the significance: darker red=more significant (Fisher test). Scale (right) is  $-\log_{10}(p\text{-value})$ .
